# Supplementary material for: Plant Trait Variation along an Altitudinal Gradient in Mediterranean High Mountain Grasslands: Controlling the Species Turnover Effect
Source: PubMed Central journal article supplement (PMC4361585; doi:10.1371/journal.pone.0118876), 2015-03-16

**S2 Figure. Location of area studied in the Sierra de Guadarrama (Spain).** Distribution and altitude (m a.s.l.) of sites where functional traits (green rings) and temperature-moisture information (white dots) were collected.

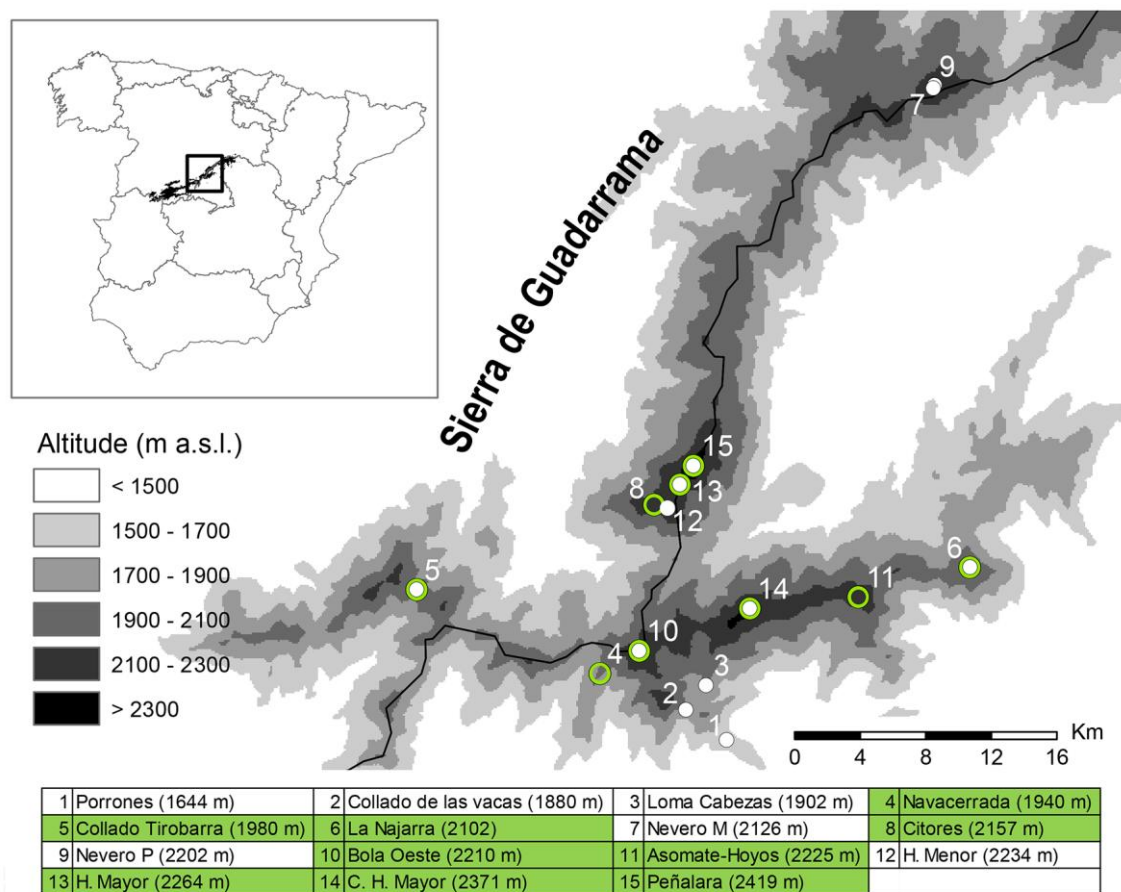

Supplement: pone.0118876.s002.pdf [file pone.0118876.s002.pdf]
