# Supplementary material for: Plant Trait Variation along an Altitudinal Gradient in Mediterranean High Mountain Grasslands: Controlling the Species Turnover Effect
Source: PubMed Central journal article supplement (PMC4361585; doi:10.1371/journal.pone.0118876), 2015-03-16
Supplement: pone.0118876.s003.pdf [file pone.0118876.s003.pdf]

**S1 Table. Functional traits and species characterization.** Means and SD (standard deviation) values of the nine functional traits of each of the eleven species sampled. The following species characteristics are shown: label, family, growth form (**Hm cae.** - caespituous hemicryptophyte; **Cs** -cushion chamaephyte; **Sh** - shrub; **Hm forb** – hemicryptophyte) and number of the sites where the species was sampled. Acronyms for the traits: leaf thickness (LT), Specific leaf area (SLA), leaf dry matter content (LDMC), leaf carbon content (LCC), leaf nitrogen content (LNC), carbon and nitrogen isotopes ratios ( $\delta^{13}\text{C}$  and  $\delta^{15}\text{N}$  respectively).

| Species                                        | Label | Family          | Growth form | Sites | Individual size (cm <sup>2</sup> ) |                      | Height (mm) |        | LT ( $\mu\text{m}$ ) |      | SLA (mm <sup>2</sup> ·mg <sup>-1</sup> ) |      | LDMC (mg·g <sup>-1</sup> ) |      | LCC (mg·g <sup>-1</sup> ) |      | $\delta^{13}\text{C}$ (‰) |      | LNC (mg·g <sup>-1</sup> ) |      | $\delta^{15}\text{N}$ (‰) |      |
|------------------------------------------------|-------|-----------------|-------------|-------|------------------------------------|----------------------|-------------|--------|----------------------|------|------------------------------------------|------|----------------------------|------|---------------------------|------|---------------------------|------|---------------------------|------|---------------------------|------|
|                                                |       |                 |             |       | mean                               | sd                   | mean        | sd     | mean                 | sd   | mean                                     | sd   | mean                       | sd   | mean                      | sd   | mean                      | sd   | mean                      | sd   | mean                      | sd   |
| <i>Agrostis delicatula</i>                     | AD    | Poaceae         | Hm cae.     | 7     | 23.45                              | 14.96                | 20.48       | 6.79   | 209.1                | 42.9 | 11.43                                    | 1.95 | 397.3                      | 44.5 | 449.5                     | 15   | -28.06                    | 0.86 | 13.67                     | 3.68 | -0.96                     | 1.90 |
| <i>Armeria caespitosa</i>                      | AC    | Plumbaginaceae  | Cs          | 9     | 9.48                               | 6.66                 | 16.19       | 4.31   | 232.3                | 37.8 | 15.07                                    | 2.23 | 350.7                      | 34.9 | 499.6                     | 16.2 | -29.38                    | 0.91 | 14.18                     | 3.13 | -1.09                     | 1.40 |
| <i>Deschampsia flexuosa</i>                    | DF    | Poaceae         | Hm cae.     | 8     | 149.35                             | 200.81               | 27.57       | 9.39   | 302.2                | 57.2 | 7.70                                     | 1.20 | 396.9                      | 30.7 | 459                       | 8    | -27.30                    | 0.91 | 12.04                     | 3.40 | -1.67                     | 1.49 |
| <i>Festuca curvifolia</i>                      | FC    | Poaceae         | Hm cae.     | 9     | 93.74                              | 96.93                | 32.40       | 9.75   | 559.3                | 101  | 4.29                                     | 0.63 | 463.5                      | 40.4 | 492.7                     | 10.9 | -26.24                    | 0.85 | 13.76                     | 3.15 | -1.15                     | 1.67 |
| <i>Jasione crispa</i>                          | JC    | Campanulaceae   | Cs          | 8     | 24.80                              | 18.78                | 14.99       | 4.48   | 188                  | 36.9 | 18.36                                    | 3.68 | 241.7                      | 27.6 | 456                       | 15.5 | -28.86                    | 1.00 | 19.76                     | 2.98 | -1.20                     | 1.30 |
| <i>Juniperus communis</i> subsp. <i>alpina</i> | JN    | Cupressaceae    | Sh          | 8     | 1.1·10 <sup>5</sup>                | 1.36·10 <sup>5</sup> | 305.05      | 491.20 | 417.9                | 68.7 | 6.47                                     | 1.13 | 434.4                      | 46.6 | 502.3                     | 14   | -25.70                    | 1.04 | 12.25                     | 2.73 | -2.04                     | 1.54 |
| <i>Jurinea humilis</i>                         | JH    | Asteraceae      | Hm forb     | 9     | 28.66                              | 18.45                | 6.96        | 3.31   | 262.3                | 38   | 10.11                                    | 1.47 | 266.3                      | 34.9 | 478.5                     | 23.5 | -29.26                    | 0.79 | 22.36                     | 4.11 | -1.52                     | 1.53 |
| <i>Minuartia recurva</i>                       | MR    | Caryophyllaceae | Cs          | 6     | 31.27                              | 28.44                | 16.71       | 6.95   | 111.2                | 53.1 | 17.16                                    | 2.78 | 340.2                      | 47.4 | 454.1                     | 8.1  | -28.67                    | 0.71 | 17.76                     | 4.77 | -1.56                     | 1.87 |
| <i>Pilosella vahlII</i>                        | PV    | Asteraceae      | Hm forb     | 9     | 15.43                              | 9.62                 | 21.98       | 8.88   | 278.1                | 49.2 | 16.73                                    | 2.91 | 207.7                      | 33.8 | 459.5                     | 27.6 | -27.55                    | 0.75 | 20.41                     | 3.64 | -2.54                     | 1.63 |
| <i>Senecio carpetanus</i>                      | SP    | Asteraceae      | Hm forb     | 6     | 35.86                              | 32.01                | 313.85      | 89.59  | 486.7                | 79.9 | 10.29                                    | 1.45 | 189.6                      | 29.3 | 453.9                     | 13.3 | -28.86                    | 0.91 | 35.26                     | 6.08 | 0.66                      | 2.94 |
| <i>Silene ciliata</i>                          | SC    | Caryophyllaceae | Cs          | 8     | 38.81                              | 26.81                | 19.58       | 5.13   | 353.1                | 70.8 | 14.06                                    | 1.88 | 207                        | 24.2 | 440.9                     | 12.8 | -27.73                    | 0.78 | 22.71                     | 4.39 | 0.30                      | 1.41 |
