# Supplementary material for: Plant Trait Variation along an Altitudinal Gradient in Mediterranean High Mountain Grasslands: Controlling the Species Turnover Effect
Source: PubMed Central journal article supplement (PMC4361585; doi:10.1371/journal.pone.0118876), 2015-03-16
Supplement: pone.0118876.s004.pdf [file pone.0118876.s004.pdf]

**S2 Table. Response of individual functional traits along several environmental variables.** Summary of linear mixed-effect models scores for each individual plant trait value and species, considering site as random factor and **A)** altitude, **B)** squared altitude, **C)** insolation coefficient, **D)** soil organic carbon (SOC), **E)** soil total nitrogen (NT), **F)** soil temperature and **G)** soil moisture as fixed factors in each model considered. Significant values ( $p < 0.05$ ) are marked in bold.

**A)**

| <b>Imer(trait<sub>i</sub>~Altitude+(1 pob)</b> | Individual size (cm <sup>2</sup> ) | Height (mm)            | LT (μm)                     | SLA (mm <sup>2</sup> ·mg <sup>-1</sup> ) | LDMC (mg·g <sup>-1</sup> ) | LCC (mg·g <sup>-1</sup> ) | δ <sup>13</sup> C (‰)        | LNC (mg·g <sup>-1</sup> ) | δ <sup>15</sup> N (‰)        |
|------------------------------------------------|------------------------------------|------------------------|-----------------------------|------------------------------------------|----------------------------|---------------------------|------------------------------|---------------------------|------------------------------|
|                                                | Estimate                           | Estimate               | Estimate                    | Estimate                                 | Estimate                   | Estimate                  | Estimate                     | Estimate                  | Estimate                     |
| <i>Agrostis delicatula</i>                     | <b>-2.33·10<sup>-3</sup></b>       | -3.35·10 <sup>-4</sup> | -7.90·10 <sup>-3</sup>      | 5.30·10 <sup>-4</sup>                    | 7.83·10 <sup>-2</sup>      | -1.24·10 <sup>-2</sup>    | -1.25·10 <sup>-3</sup>       | 2.51·10 <sup>-3</sup>     | -3.36·10 <sup>-3</sup>       |
| <i>Armeria caespitosa</i>                      | -1.44·10 <sup>-4</sup>             | 2.39·10 <sup>-4</sup>  | -8.19·10 <sup>-3</sup>      | 1.84·10 <sup>-3</sup>                    | -5.76·10 <sup>-2</sup>     | 3.04·10 <sup>-2</sup>     | 1.57·10 <sup>-3</sup>        | 1.42·10 <sup>-3</sup>     | -2.41·10 <sup>-3</sup>       |
| <i>Deschampsia flexuosa</i>                    | -8.23·10 <sup>-4</sup>             | 5.95·10 <sup>-4</sup>  | <b>0.17</b>                 | -1.35·10 <sup>-3</sup>                   | 2.87·10 <sup>-3</sup>      | 1.98·10 <sup>-2</sup>     | -2.40·10 <sup>-3</sup>       | 4.99·10 <sup>-3</sup>     | -3.59·10 <sup>-3</sup>       |
| <i>Festuca curvifolia</i>                      | 1.77·10 <sup>-4</sup>              | 2.71·10 <sup>-4</sup>  | 0.22                        | -1.58·10 <sup>-3</sup>                   | 9.73·10 <sup>-2</sup>      | -1.42·10 <sup>-2</sup>    | <b>3.33·10<sup>-3</sup></b>  | 1.40·10 <sup>-3</sup>     | -3.04·10 <sup>-3</sup>       |
| <i>Jasione crispa</i>                          | -1.44·10 <sup>-3</sup>             | -1.15·10 <sup>-4</sup> | -1.44·10 <sup>-2</sup>      | 2.02·10 <sup>-4</sup>                    | 1.68·10 <sup>-2</sup>      | 8.16·10 <sup>-3</sup>     | 1.74·10 <sup>-3</sup>        | -7.25·10 <sup>-3</sup>    | 6.56·10 <sup>-4</sup>        |
| <i>Juniperus communis</i> subsp. <i>alpina</i> | <b>-2.59·10<sup>-3</sup></b>       | -9.57·10 <sup>-4</sup> | -1.49·10 <sup>-2</sup>      | 2.19·10 <sup>-3</sup>                    | -7.02·10 <sup>-2</sup>     | -3.11·10 <sup>-2</sup>    | 2.56·10 <sup>-4</sup>        | 1.06·10 <sup>-3</sup>     | -4.22·10 <sup>-3</sup>       |
| <i>Jurinea humilis</i>                         | -7.91·10 <sup>-4</sup>             | 9.95·10 <sup>-5</sup>  | <b>9.97·10<sup>-2</sup></b> | -9.90·10 <sup>-4</sup>                   | 1.95·10 <sup>-2</sup>      | 1.69·10 <sup>-2</sup>     | <b>-2.31·10<sup>-3</sup></b> | 7.19·10 <sup>-3</sup>     | -1.92·10 <sup>-3</sup>       |
| <i>Minuartia recurva</i>                       | 1.46·10 <sup>-3</sup>              | 1.33·10 <sup>-3</sup>  | -0.12                       | -7.72·10 <sup>-3</sup>                   | <b>0.21</b>                | 5.88·10 <sup>-3</sup>     | -8.00·10 <sup>-6</sup>       | -3.07·10 <sup>-2</sup>    | -1.05·10 <sup>-2</sup>       |
| <i>Pilosella vahlia</i>                        | -1.52·10 <sup>-3</sup>             | 2.41·10 <sup>-4</sup>  | <b>0.17</b>                 | <b>8.34·10<sup>-3</sup></b>              | <b>-0.14</b>               | 1.54·10 <sup>-2</sup>     | 3.61·10 <sup>-5</sup>        | -1.59·10 <sup>-3</sup>    | <b>-5.77·10<sup>-3</sup></b> |
| <i>Senecio carpetanus</i>                      | <b>-2.58·10<sup>-3</sup></b>       | 1.76·10 <sup>-4</sup>  | 0.20                        | 1.57·10 <sup>-3</sup>                    | -5.87·10 <sup>-2</sup>     | -2.29·10 <sup>-2</sup>    | -1.15·10 <sup>-3</sup>       | -1.97·10 <sup>-3</sup>    | 3.89·10 <sup>-3</sup>        |
| <i>Silene ciliata</i>                          | <b>-2.56·10<sup>-3</sup></b>       | -4.31·10 <sup>-4</sup> | <b>0.23</b>                 | -2.80·10 <sup>-3</sup>                   | 2.38·10 <sup>-2</sup>      | 9.73·10 <sup>-3</sup>     | 1.37·10 <sup>-3</sup>        | -1.04·10 <sup>-2</sup>    | 8.51·10 <sup>-5</sup>        |

**B)**

| <b>lmer(trait<sub>i</sub>~AltitudeQ+(1 pob)</b> | Individual size (cm <sup>2</sup> ) | Height (mm)                  | LT (μm)     | SLA (mm <sup>2</sup> ·mg <sup>-1</sup> ) | LDMC (mg·g <sup>-1</sup> ) | LCC (mg·g <sup>-1</sup> ) | δ <sup>13</sup> C (‰)  | LNC (mg·g <sup>-1</sup> ) | δ <sup>15</sup> N (‰)        |
|-------------------------------------------------|------------------------------------|------------------------------|-------------|------------------------------------------|----------------------------|---------------------------|------------------------|---------------------------|------------------------------|
|                                                 | Estimate                           | Estimate                     | Estimate    | Estimate                                 | Estimate                   | Estimate                  | Estimate               | Estimate                  | Estimate                     |
| <i>Agrostis delicatula</i>                      | -4.24·10 <sup>-3</sup>             | -2.94·10 <sup>-2</sup>       | -0.20       | -0.10                                    | 2.69                       | -4.82·10 <sup>-2</sup>    | 3.23·10 <sup>-2</sup>  | -0.14                     | <b>-9.83·10<sup>-2</sup></b> |
| <i>Armeria caespitosa</i>                       | 3.02·10 <sup>-2</sup>              | 9.97·10 <sup>-4</sup>        | 2.03        | -6.86·10 <sup>-2</sup>                   | 1.70                       | -0.21                     | 2.14·10 <sup>-2</sup>  | 1.25·10 <sup>-2</sup>     | 3.27·10 <sup>-2</sup>        |
| <i>Deschampsia flexuosa</i>                     | 8.65·10 <sup>-2</sup>              | -4.73·10 <sup>-3</sup>       | -1.26       | 8.63·10 <sup>-3</sup>                    | -0.48                      | -0.27                     | -3.89·10 <sup>-2</sup> | -6.91·10 <sup>-2</sup>    | -5.26·10 <sup>-2</sup>       |
| <i>Festuca curvifolia</i>                       | 2.64·10 <sup>-2</sup>              | 2.64·10 <sup>-4</sup>        | 5.22        | -1.14·10 <sup>-2</sup>                   | 0.43                       | 0.49                      | 1.36·10 <sup>-3</sup>  | -4.13·10 <sup>-2</sup>    | 0.10                         |
| <i>Jasione crispa</i>                           | 3.20·10 <sup>-2</sup>              | <b>-2.78·10<sup>-2</sup></b> | 2.31        | 2.93·10 <sup>-2</sup>                    | -1.15                      | -0.30                     | 6.37·10 <sup>-2</sup>  | 4.92·10 <sup>-2</sup>     | 3.51·10 <sup>-2</sup>        |
| <i>Juniperus communis</i> subsp. <i>alpina</i>  | -2.15·10 <sup>-3</sup>             | <b>2.29·10<sup>-2</sup></b>  | 1.37        | -2.70·10 <sup>-2</sup>                   | 0.78                       | 0.46                      | -1.91·10 <sup>-2</sup> | -2.99·10 <sup>-2</sup>    | 3.22·10 <sup>-2</sup>        |
| <i>Jurinea humilis</i>                          | -6.02·10 <sup>-3</sup>             | -1.25·10 <sup>-2</sup>       | 0.34        | 8.99·10 <sup>-3</sup>                    | 1.28                       | 0.37                      | 8.01·10 <sup>-3</sup>  | 8.94·10 <sup>-3</sup>     | -9.62·10 <sup>-2</sup>       |
| <i>Minuartia recurva</i>                        | 5.37·10 <sup>-3</sup>              | 4.41·10 <sup>-3</sup>        | -0.47       | 0.10                                     | 0.76                       | 0.20                      | 3.34·10 <sup>-2</sup>  | -0.82                     | -1.91·10 <sup>-1</sup>       |
| <i>Pilosella vahlII</i>                         | -8.32·10 <sup>-3</sup>             | -8.69·10 <sup>-3</sup>       | <b>2.81</b> | 5.59·10 <sup>-2</sup>                    | -1.01                      | 1.18                      | 1.66·10 <sup>-2</sup>  | -2.75·10 <sup>-2</sup>    | 6.03·10 <sup>-2</sup>        |
| <i>Senecio carpetanus</i>                       | -4.25·10 <sup>-2</sup>             | -7.83·10 <sup>-3</sup>       | 0.56        | 3.60·10 <sup>-2</sup>                    | -0.31                      | -0.12                     | 5.66·10 <sup>-2</sup>  | 0.22                      | 0.22                         |
| <i>Silene ciliata</i>                           | -1.39·10 <sup>-2</sup>             | -1.87·10 <sup>-2</sup>       | <b>5.07</b> | -6.08·10 <sup>-2</sup>                   | 1.02                       | -0.19                     | 4.28·10 <sup>-2</sup>  | -0.10                     | -6.04·10 <sup>-3</sup>       |

**C)**

| <b>lmer(trait<sub>i</sub>~Insolation+(1 pob)</b> | Individual size (cm <sup>2</sup> ) | Height (mm) | LT (μm)       | SLA (mm <sup>2</sup> ·mg <sup>-1</sup> ) | LDMC (mg·g <sup>-1</sup> ) | LCC (mg·g <sup>-1</sup> ) | δ <sup>13</sup> C (‰) | LNC (mg·g <sup>-1</sup> ) | δ <sup>15</sup> N (‰)  |
|--------------------------------------------------|------------------------------------|-------------|---------------|------------------------------------------|----------------------------|---------------------------|-----------------------|---------------------------|------------------------|
|                                                  | Estimate                           | Estimate    | Estimate      | Estimate                                 | Estimate                   | Estimate                  | Estimate              | Estimate                  | Estimate               |
| <i>Agrostis delicatula</i>                       | 0.90                               | -0.15       | <b>192.02</b> | -3.63                                    | -34.90                     | -6.22                     | -0.80                 | 8.88                      | 1.70                   |
| <i>Armeria caespitosa</i>                        | <b>5.36</b>                        | 1.54        | 98.52         | 1.57                                     | 133.61                     | 64.99                     | 1.08                  | 11.00                     | 5.81                   |
| <i>Deschampsia flexuosa</i>                      | -3.96                              | -1.04       | -66.58        | 9.47·10 <sup>-2</sup>                    | 22.00                      | -25.00                    | <b>-5.84</b>          | -3.36                     | 3.50                   |
| <i>Festuca curvifolia</i>                        | 2.33                               | 0.51        | 394.39        | -2.87                                    | 149.55                     | <b>-62.64</b>             | 0.75                  | -5.04                     | 3.48                   |
| <i>Jasione crispa</i>                            | 1.52                               | -0.28       | -36.31        | 5.69                                     | 12.40                      | 17.02                     | 2.75                  | 2.70                      | 2.31                   |
| <i>Juniperus communis</i> subsp. <i>alpina</i>   | 2.77                               | 0.12        | 166.96        | 1.65                                     | -119.92                    | -17.72                    | -0.97                 | 11.22                     | 7.64                   |
| <i>Jurinea humilis</i>                           | 0.12                               | 1.42        | 148.97        | -2.90                                    | 65.64                      | -39.69                    | -3.00                 | -10.34                    | -5.78·10 <sup>-2</sup> |
| <i>Minuartia recurva</i>                         | 5.54                               | 0.50        | 173.23        | -9.02                                    | -49.50                     | <b>50.42</b>              | <b>4.23</b>           | -23.86                    | 5.35                   |
| <i>Pilosella vahlII</i>                          | -0.65                              | -0.95       | -6.20         | -1.71                                    | 74.77                      | -48.87                    | -0.94                 | 6.00                      | 3.39                   |
| <i>Senecio carpetanus</i>                        | -4.82                              | 1.35        | -57.61        | -1.77                                    | 42.31                      | -57.53                    | -1.36                 | -35.23                    | 2.32                   |
| <i>Silene ciliata</i>                            | -0.90                              | -1.07       | 333.43        | -8.84                                    | 33.96                      | 12.10                     | <b>4.66</b>           | -6.17                     | 0.76                   |

**D)**

| <b>Imer(trait<sub>i</sub>~SOC+(1 pob)</b>      | Individual size (cm <sup>2</sup> ) | Height (mm)                  | LT (μm)               | SLA (mm <sup>2</sup> ·mg <sup>-1</sup> ) | LDMC (mg·g <sup>-1</sup> ) | LCC (mg·g <sup>-1</sup> ) | δ <sup>13</sup> C (‰)  | LNC (mg·g <sup>-1</sup> ) | δ <sup>15</sup> N (‰)  |
|------------------------------------------------|------------------------------------|------------------------------|-----------------------|------------------------------------------|----------------------------|---------------------------|------------------------|---------------------------|------------------------|
|                                                | Estimate                           | Estimate                     | Estimate              | Estimate                                 | Estimate                   | Estimate                  | Estimate               | Estimate                  | Estimate               |
| <i>Agrostis delicatula</i>                     | 0.12                               | 1.18·10 <sup>-2</sup>        | 2.67                  | 0.22                                     | <b>-9.71</b>               | 1.04                      | -4.84·10 <sup>-2</sup> | 5.86·10 <sup>-2</sup>     | 0.21                   |
| <i>Armeria caespitosa</i>                      | 1.21·10 <sup>-2</sup>              | -5.44·10 <sup>-3</sup>       | 9.82·10 <sup>-2</sup> | 0.11                                     | 0.28                       | -1.81                     | <b>-0.17</b>           | 0.12                      | 0.21                   |
| <i>Deschampsia flexuosa</i>                    | -4.84·10 <sup>-2</sup>             | <b>-6.89·10<sup>-2</sup></b> | -6.79                 | 8.12·10 <sup>-2</sup>                    | 0.57                       | -0.64                     | 9.65·10 <sup>-2</sup>  | -2.66·10 <sup>-3</sup>    | <b>0.36</b>            |
| <i>Festuca curvifolia</i>                      | -6.17·10 <sup>-2</sup>             | -1.18·10 <sup>-2</sup>       | -19.80                | 0.10                                     | -5.28                      | -0.19                     | <b>-0.19</b>           | 9.28·10 <sup>-2</sup>     | 0.28                   |
| <i>Jasione crispa</i>                          | 0.10                               | -4.69·10 <sup>-2</sup>       | 5.23                  | 0.26                                     | -3.03                      | 1.62                      | 9.61·10 <sup>-2</sup>  | 0.66                      | 0.15                   |
| <i>Juniperus communis</i> subsp. <i>alpina</i> | <b>0.22</b>                        | 5.31·10 <sup>-2</sup>        | 6.16                  | -0.20                                    | 6.69                       | 2.03                      | 5.63·10 <sup>-3</sup>  | 0.18                      | <b>0.38</b>            |
| <i>Jurinea humilis</i>                         | 2.95·10 <sup>-2</sup>              | 3.63·10 <sup>-2</sup>        | -4.47                 | 1.96·10 <sup>-2</sup>                    | 0.57                       | -1.55                     | 5.85·10 <sup>-2</sup>  | -0.39                     | 0.30                   |
| <i>Minuartia recurva</i>                       | -0.16                              | <b>-0.13</b>                 | 7.43                  | 0.47                                     | -6.27                      | -0.13                     | -7.36·10 <sup>-2</sup> | 1.45                      | 0.40                   |
| <i>Pilosella vahlII</i>                        | 8.11·10 <sup>-2</sup>              | -2.46·10 <sup>-2</sup>       | <b>-11.51</b>         | -0.45                                    | <b>7.89</b>                | -0.86                     | 1.52·10 <sup>-2</sup>  | 0.56                      | <b>0.44</b>            |
| <i>Senecio carpetanus</i>                      | -7.62·10 <sup>-2</sup>             | -1.79·10 <sup>-2</sup>       | 13.41                 | -0.23                                    | 3.29                       | 2.22                      | 0.14                   | -0.27                     | 0.16                   |
| <i>Silene ciliata</i>                          | 0.11                               | 2.73·10 <sup>-2</sup>        | -0.23                 | -8.60·10 <sup>-2</sup>                   | 2.66                       | 1.27                      | -5.09·10 <sup>-2</sup> | 0.18                      | -8.75·10 <sup>-2</sup> |

**E)**

| <b>Imer(trait<sub>i</sub>~NT+(1 pob)</b>       | Individual size (cm <sup>2</sup> ) | Height (mm)                  | LT (μm)       | SLA (mm <sup>2</sup> ·mg <sup>-1</sup> ) | LDMC (mg·g <sup>-1</sup> ) | LCC (mg·g <sup>-1</sup> ) | δ <sup>13</sup> C (‰)  | LNC (mg·g <sup>-1</sup> ) | δ <sup>15</sup> N (‰) |
|------------------------------------------------|------------------------------------|------------------------------|---------------|------------------------------------------|----------------------------|---------------------------|------------------------|---------------------------|-----------------------|
|                                                | Estimate                           | Estimate                     | Estimate      | Estimate                                 | Estimate                   | Estimate                  | Estimate               | Estimate                  | Estimate              |
| <i>Agrostis delicatula</i>                     | 0.15                               | 2.00·10 <sup>-2</sup>        | 3.39          | 0.32                                     | <b>-12.53</b>              | 1.40                      | -8.60·10 <sup>-2</sup> | 5.42·10 <sup>-2</sup>     | 0.25                  |
| <i>Armeria caespitosa</i>                      | 3.07·10 <sup>-2</sup>              | 8.68·10 <sup>-3</sup>        | -1.73         | 0.14                                     | 0.18                       | -1.89                     | <b>-0.22</b>           | 7.20·10 <sup>-2</sup>     | 0.25                  |
| <i>Deschampsia flexuosa</i>                    | -7.24·10 <sup>-2</sup>             | <b>-8.53·10<sup>-2</sup></b> | -7.44         | 0.10                                     | 0.50                       | -0.95                     | 0.12                   | 5.54·10 <sup>-3</sup>     | <b>0.44</b>           |
| <i>Festuca curvifolia</i>                      | -8.36·10 <sup>-2</sup>             | -1.41·10 <sup>-2</sup>       | -25.30        | 0.15                                     | -7.82                      | -0.69                     | -0.22                  | 0.12                      | 0.35                  |
| <i>Jasione crispa</i>                          | 0.11                               | -3.60·10 <sup>-2</sup>       | 1.53          | 0.57                                     | -3.50                      | 2.57                      | 9.45·10 <sup>-2</sup>  | 0.75                      | 0.16                  |
| <i>Juniperus communis</i> subsp. <i>alpina</i> | <b>0.28</b>                        | 6.30·10 <sup>-2</sup>        | 7.60          | -0.25                                    | 8.35                       | 2.60                      | 2.99·10 <sup>-3</sup>  | 0.18                      | <b>0.49</b>           |
| <i>Jurinea humilis</i>                         | 9.60·10 <sup>-2</sup>              | 9.39·10 <sup>-2</sup>        | -5.89         | 2.69·10 <sup>-2</sup>                    | 1.23                       | -2.24                     | 5.01·10 <sup>-2</sup>  | -0.32                     | <b>0.45</b>           |
| <i>Minuartia recurva</i>                       | -0.21                              | -0.16                        | 7.85          | 0.42                                     | -2.14                      | -0.27                     | -0.14                  | 1.74                      | 0.37                  |
| <i>Pilosella vahlII</i>                        | 0.10                               | -3.35·10 <sup>-2</sup>       | <b>-14.83</b> | -0.49                                    | 8.78                       | -3.41                     | 3.51·10 <sup>-3</sup>  | 0.68                      | <b>0.54</b>           |
| <i>Senecio carpetanus</i>                      | -0.14                              | 1.42·10 <sup>-2</sup>        | 13.81         | -0.25                                    | 2.63                       | 0.18                      | 5.94·10 <sup>-2</sup>  | -1.46                     | 6.81·10 <sup>-2</sup> |
| <i>Silene ciliata</i>                          | 0.14                               | 1.79·10 <sup>-2</sup>        | -0.16         | -5.16·10 <sup>-2</sup>                   | 0.36                       | 1.67                      | -4.16·10 <sup>-2</sup> | 0.44                      | -0.26                 |

**F)**

| <b>Imer(trait<sub>i</sub>~Temperature+(1 pob)</b> | Individual size (cm <sup>2</sup> ) | Height (mm)            | LT (μm)  | SLA (mm <sup>2</sup> ·mg <sup>-1</sup> ) | LDMC (mg·g <sup>-1</sup> ) | LCC (mg·g <sup>-1</sup> ) | δ <sup>13</sup> C (‰)  | LNC (mg·g <sup>-1</sup> ) | δ <sup>15</sup> N (‰) |
|---------------------------------------------------|------------------------------------|------------------------|----------|------------------------------------------|----------------------------|---------------------------|------------------------|---------------------------|-----------------------|
|                                                   | Estimate                           | Estimate               | Estimate | Estimate                                 | Estimate                   | Estimate                  | Estimate               | Estimate                  | Estimate              |
| <i>Agrostis delicatula</i>                        | 0.33                               | 0.17                   | -6.95    | -1.16                                    | 14.52                      | -1.71                     | 0.75                   | -1.17                     | 0.42                  |
| <i>Armeria caespitosa</i>                         | -0.25                              | -0.18                  | 1.19     | -0.32                                    | 7.00                       | -8.33                     | 0.32                   | <b>-2.06</b>              | -0.69                 |
| <i>Deschampsia flexuosa</i>                       | 0.24                               | 0.11                   | -34.31   | 6.04·10 <sup>-2</sup>                    | 3.22                       | -4.13                     | 0.19                   | <b>-2.25</b>              | -0.34                 |
| <i>Festuca curvifolia</i>                         | -8.28·10 <sup>-2</sup>             | -1.07·10 <sup>-2</sup> | -35.61   | 0.21                                     | -9.33                      | 6.97                      | 4.54·10 <sup>-2</sup>  | -1.49                     | 0.12                  |
| <i>Jasione crispa</i>                             | -0.13                              | 2.81·10 <sup>-2</sup>  | 0.91     | -0.49                                    | -2.92                      | <b>-8.84</b>              | -0.66                  | -1.44                     | -0.86                 |
| <i>Juniperus communis</i> subsp. <i>alpina</i>    | 0.21                               | 0.19                   | -24.26   | -0.37                                    | 20.55                      | 8.34                      | -0.17                  | <b>-1.10</b>              | -0.50                 |
| <i>Jurinea humilis</i>                            | -0.27                              | -0.19                  | -13.01   | 0.24                                     | -11.93                     | 2.48                      | 0.45                   | <b>-2.79</b>              | -0.94                 |
| <i>Minuartia recurva</i>                          | -2.92·10 <sup>-2</sup>             | 9.60·10 <sup>-2</sup>  | -8.98    | 0.41                                     | -5.52                      | -1.29                     | 7.14·10 <sup>-2</sup>  | -1.13                     | -0.45                 |
| <i>Pilosella vahlII</i>                           | -0.13                              | 5.90·10 <sup>-2</sup>  | -14.90   | -0.73                                    | 7.58                       | 17.12                     | 0.22                   | -1.81                     | -0.11                 |
| <i>Senecio carpetanus</i>                         | 0.39                               | -0.15                  | -10.68   | 0.68                                     | -13.38                     | -2.26                     | 0.34                   | 2.64                      | 0.85                  |
| <i>Silene ciliata</i>                             | 0.23                               | 0.11                   | -18.04   | 0.43                                     | -7.74                      | -4.14                     | -9.73·10 <sup>-2</sup> | -1.03                     | -0.47                 |

**G)**

| <b>Imer(trait<sub>i</sub>~Moisture+(1 pob)</b> | Individual size (cm <sup>2</sup> ) | Height (mm)            | LT (μm)  | SLA (mm <sup>2</sup> ·mg <sup>-1</sup> ) | LDMC (mg·g <sup>-1</sup> ) | LCC (mg·g <sup>-1</sup> ) | δ <sup>13</sup> C (‰)        | LNC (mg·g <sup>-1</sup> ) | δ <sup>15</sup> N (‰)  |
|------------------------------------------------|------------------------------------|------------------------|----------|------------------------------------------|----------------------------|---------------------------|------------------------------|---------------------------|------------------------|
|                                                | Estimate                           | Estimate               | Estimate | Estimate                                 | Estimate                   | Estimate                  | Estimate                     | Estimate                  | Estimate               |
| <i>Agrostis delicatula</i>                     | -1.52·10 <sup>-2</sup>             | -2.49·10 <sup>-3</sup> | 0.11     | 4.50·10 <sup>-2</sup>                    | -0.46                      | 0.13                      | <b>-3.69·10<sup>-2</sup></b> | 5.30·10 <sup>-2</sup>     | -1.21·10 <sup>-2</sup> |
| <i>Armeria caespitosa</i>                      | -2.05·10 <sup>-3</sup>             | 5.23·10 <sup>-3</sup>  | -0.38    | 3.54·10 <sup>-2</sup>                    | -1.17                      | 0.16                      | -1.47·10 <sup>-2</sup>       | 6.28·10 <sup>-2</sup>     | 2.87·10 <sup>-2</sup>  |
| <i>Deschampsia flexuosa</i>                    | -1.46·10 <sup>-2</sup>             | -1.10·10 <sup>-3</sup> | 1.95     | -6.37·10 <sup>-3</sup>                   | -1.25·10 <sup>-3</sup>     | 0.19                      | -8.79·10 <sup>-3</sup>       | <b>0.10</b>               | 1.05·10 <sup>-2</sup>  |
| <i>Festuca curvifolia</i>                      | -4.54·10 <sup>-4</sup>             | 5.24·10 <sup>-3</sup>  | 1.37     | -9.84·10 <sup>-3</sup>                   | 0.60                       | -0.21                     | 1.00·10 <sup>-2</sup>        | 8.18·10 <sup>-3</sup>     | -1.11·10 <sup>-3</sup> |
| <i>Jasione crispa</i>                          | -3.17·10 <sup>-3</sup>             | -5.01·10 <sup>-3</sup> | -0.34    | 7.86·10 <sup>-2</sup>                    | -0.45                      | 0.30                      | 2.21·10 <sup>-2</sup>        | 5.05·10 <sup>-2</sup>     | 4.71·10 <sup>-2</sup>  |
| <i>Juniperus communis</i> subsp. <i>alpina</i> | -5.77·10 <sup>-3</sup>             | -4.31·10 <sup>-3</sup> | 1.53     | -7.26·10 <sup>-3</sup>                   | 1.77·10 <sup>-2</sup>      | -0.15                     | 4.77·10 <sup>-3</sup>        | 3.64·10 <sup>-2</sup>     | 2.96·10 <sup>-2</sup>  |
| <i>Jurinea humilis</i>                         | -4.02·10 <sup>-4</sup>             | 7.26·10 <sup>-3</sup>  | 0.87     | -2.03·10 <sup>-2</sup>                   | 0.34                       | -5.90·10 <sup>-2</sup>    | -2.72·10 <sup>-2</sup>       | 9.97·10 <sup>-2</sup>     | 6.00·10 <sup>-2</sup>  |
| <i>Minuartia recurva</i>                       | -1.66·10 <sup>-2</sup>             | -8.32·10 <sup>-3</sup> | -0.22    | 7.32·10 <sup>-3</sup>                    | 1.30                       | -2.45·10 <sup>-2</sup>    | -1.78·10 <sup>-2</sup>       | -6.34·10 <sup>-2</sup>    | -4.71·10 <sup>-2</sup> |
| <i>Pilosella vahlII</i>                        | 8.10·10 <sup>-3</sup>              | 4.61·10 <sup>-3</sup>  | 0.59     | 8.84·10 <sup>-2</sup>                    | -0.94                      | -0.11                     | -8.41·10 <sup>-3</sup>       | 9.79·10 <sup>-2</sup>     | -2.15·10 <sup>-3</sup> |
| <i>Senecio carpetanus</i>                      | <b>-3.08·10<sup>-2</sup></b>       | 4.54·10 <sup>-3</sup>  | 2.07     | -4.96·10 <sup>-3</sup>                   | -0.16                      | -0.12                     | -1.52·10 <sup>-2</sup>       | -8.53·10 <sup>-2</sup>    | 1.55·10 <sup>-2</sup>  |
| <i>Silene ciliata</i>                          | -1.86·10 <sup>-2</sup>             | -4.00·10 <sup>-3</sup> | 1.77     | -2.71·10 <sup>-3</sup>                   | 0.15                       | 5.64·10 <sup>-2</sup>     | 1.29·10 <sup>-4</sup>        | -1.63·10 <sup>-2</sup>    | 1.41·10 <sup>-2</sup>  |
