# Supplementary material for: Plant Trait Variation along an Altitudinal Gradient in Mediterranean High Mountain Grasslands: Controlling the Species Turnover Effect
Source: PubMed Central journal article supplement (PMC4361585; doi:10.1371/journal.pone.0118876), 2015-03-16
Supplement: pone.0118876.s005.pdf [file pone.0118876.s005.pdf]

**S3 Table. Species turnover and intra-specific trait variability relative contribution (in %) on CWM and FD response to altitude.** Three ANOVAs and Sum of squared (SS) decomposition for **A)**  $CWM_s$  (species turnover and intra-specific effects),  $CWM_f$  (species turnover effect) and differences between them (intra-specific trait variability effect) and **B)**  $FD_s$  (species turnover and intra-specific effects),  $FD_f$  (species turnover effect) and their differences (intra-specific trait variability effect); to establish the relative effect on CWM and FD response to altitude respectively of species turnover and intra-specific trait variability for each functional trait considered. Covariation effect consider the positive (positive covariation term) or negative (negative covariation term) correlation between species turnover and intra-specific effects. Significant values ( $p < 0.05$ ) are marked in bold.

**A) CWM**

| Functional trait                         | Turnover effect | Intra-specific effect | Covariance effects | Total effect |
|------------------------------------------|-----------------|-----------------------|--------------------|--------------|
| Individual size (cm <sup>2</sup> )       | 3,1             | 0,0                   | -0,4               | 2,7          |
| Height (mm)                              | 3,9             | 5,2                   | -9,0               | 0,1          |
| LT (μm)                                  | 13,3            | 16,3                  | -29,4              | 0,2          |
| SLA (mm <sup>2</sup> ·mg <sup>-1</sup> ) | 50,2            | 2,2                   | -20,9              | 31,5         |
| LDMC (mg·g <sup>-1</sup> )               | 21,6            | 18,1                  | -39,5              | 0,2          |
| LCC (mg·g <sup>-1</sup> )                | 7,8             | 2,9                   | 9,5                | 20,2         |
| δ <sup>13</sup> C (‰)                    | 14,3            | <b>86,4</b>           | -70,3              | 30,4         |
| LNC (mg·g <sup>-1</sup> )                | 3,2             | 0,0                   | 0,8                | 4,0          |
| δ <sup>15</sup> N (‰)                    | 0,2             | 24,0                  | 4,0                | 28,1         |

**B) FD (Rao)**

| Functional trait                         | Turnover effect | Intra-specific effect | Covariation effect | Total effect |
|------------------------------------------|-----------------|-----------------------|--------------------|--------------|
| Individual size (cm <sup>2</sup> )       | 5.9             | 3.6                   | -9.3               | 0.3          |
| Height (mm)                              | 6.0             | 9.6                   | -15.2              | 0.4          |
| LT (μm)                                  | 25.5            | 2.1                   | 14.7               | 42.2         |
| SLA (mm <sup>2</sup> ·mg <sup>-1</sup> ) | <b>65.1</b>     | 1.1                   | 17.1               | <b>83.4</b>  |
| LDMC (mg·g <sup>-1</sup> )               | 27.7            | 7.5                   | 28.8               | <b>63.9</b>  |
| LCC (mg·g <sup>-1</sup> )                | 62.9            | 10.4                  | -51.1              | 22.1         |
| δ <sup>13</sup> C (‰)                    | 19.9            | <b>18.0</b>           | 37.9               | <b>75.8</b>  |
| LNC (mg·g <sup>-1</sup> )                | 7.6             | 3.7                   | -10.6              | 0.7          |
| δ <sup>15</sup> N (‰)                    | 4.6             | <b>29.8</b>           | 23.5               | <b>57.9</b>  |
