# Supplementary material for: Plant Trait Variation along an Altitudinal Gradient in Mediterranean High Mountain Grasslands: Controlling the Species Turnover Effect
Source: PLoS One. 2015 Mar 16;10(3):e0118876. doi: 10.1371/journal.pone.0118876 (PMC4361585; doi:10.1371/journal.pone.0118876)
Supplement: S4 Table — Acronyms for the traits: leaf thickness (LT), specific leaf area (SLA), leaf dry matter content (LDMC), leaf carbon content (LCC), leaf nitrogen content (LNC), carbon and nitrogen isotopes ratios (δ13C and δ15N respectably). (XLSX) [file pone.0118876.s006.xlsx]

## Sheet: Hoja1
Id.	Site	Species	Individual size (cm2)	Height (mm)	LT (µm)	SLA (mm2·mg-1)	LDMC (mg·g-1)	LCC (mg·g-1)	δ13C (‰)	LNC (mg·g-1)	δ15N (‰)
111	Bola Oeste	Pilosella vahlii	12.9243	23.96	282	19.0652	184.663	438.437	-27.45	22.0924	-2.01
112	Bola Oeste	Pilosella vahlii	16.9332	24.69	316	19.1948	153.242	559.456	-26.78	21.3432	-5.59
113	Bola Oeste	Pilosella vahlii	6.20716	21.495	275	14.5908	209.511	571.698	-27.02	21.0309	-3.69
114	Bola Oeste	Pilosella vahlii	9.43106	23.645	283	18.9369	161.596	566.708	-26.71	22.1148	-3.89
115	Bola Oeste	Pilosella vahlii	10.5145	24.545	288	20.2477	169.876	557.822	-26.81	21.2137	0.54
116	Bola Oeste	Pilosella vahlii	18.9325	27.09	284	16.9572	174.332	529.148	-26.17	20.8365	-2.12
117	Bola Oeste	Pilosella vahlii	8.50052	23.435	287	18.4996	184.375	486.406	-27.22	19.717	-3.54
118	Bola Oeste	Pilosella vahlii	5.00587	21.945	250	16.7303	234.329	490.91	-26.16	24.5078	-3.49
119	Bola Oeste	Pilosella vahlii	19.2826	24.61	345	18.7242	162.242	458.721	-27.07	21.5999	-2.09
1110	Bola Oeste	Pilosella vahlii	18.0821	26.41	250	18.6027	197.729	465.26	-27.61	20.2116	-2.43
121	Bola Oeste	Senecio carpetanus	26.635	280.7	525	10.3914	163.144	451.937	-26.47	46.5348	4.66
122	Bola Oeste	Senecio carpetanus	37.486	251	605	11.305	139.073	431.696	-28.17	47.4853	4.24
123	Bola Oeste	Senecio carpetanus	29.8786	271	480	12.4767	156.005	461.609	-28.49	44.5635	4.05
124	Bola Oeste	Senecio carpetanus	35.4869	319	585	10.3757	149.194	441.343	-27.4	44.9093	7.04
125	Bola Oeste	Senecio carpetanus	32.1639	248	552	11.7931	158.752	448.036	-28.48	45.708	7.02
126	Bola Oeste	Senecio carpetanus	18.7011	158	645	11.5514	140.186	460.532	-27.91	48.6869	4.61
127	Bola Oeste	Senecio carpetanus	36.0066	198	520	11.7118	147.644	439.437	-28.98	40.2831	8.43
128	Bola Oeste	Senecio carpetanus	35.2888	208	572	11.8751	148.873	473.021	-28.97	39.0961	-0.57
129	Bola Oeste	Senecio carpetanus	14.7968	70	587	10.6842	192.552	455.497	-27.29	35.5594	2.69
1210	Bola Oeste	Senecio carpetanus	12.5262	338	347	15.7746	151.253	456.717	-29.97	37.3411	-3.06
131	Bola Oeste	Jurinea humilis	12.4117	5.97	215	9.1257	289.003	455.102	-29.53	19.062	-2.75
132	Bola Oeste	Jurinea humilis	8.51622	3.32	305	9.468	228.8	462.764	-27.73	19.2801	-0.25
133	Bola Oeste	Jurinea humilis	12.859	2.23	240	11.4311	239.634	664.342	-30.3	28.5135	-2.6
134	Bola Oeste	Jurinea humilis	10.4606	4.16	220	11.4623	239.584	471.653	-30.04	19.7077	-2.74
135	Bola Oeste	Jurinea humilis	3.94427	3.6	255	13.2179	235.608	465.824	-30	20.3204	-2.57
136	Bola Oeste	Jurinea humilis	11.098	3.68	290	9.26738	237.823	456.209	-28.59	22.9171	-1.79
137	Bola Oeste	Jurinea humilis	10.5124	3.79	265	9.80363	255.691	468.596	-29.34	19.0407	-2.43
138	Bola Oeste	Jurinea humilis	6.34173	3.75	262	10.7789	238.837	479.145	-29.33	27.6709	-2.32
139	Bola Oeste	Jurinea humilis	12.2162	3.1	246	8.96157	261.675	458.087	-28.05	18.2396	-2.16
1310	Bola Oeste	Jurinea humilis	11.1483	3.21	260	10.2666	277.904	467.327	-29.07	24.7618	-4.38
141	Bola Oeste	Armeria caespitosa	3.76126	13.61	200	16.9407	322.475	484.918	-29.8	11.087	-2.62
142	Bola Oeste	Armeria caespitosa	1.70283	8.95	215	17.5489	304.107	479.816	-29.5	13.4288	-1.87
143	Bola Oeste	Armeria caespitosa	12.4413	7.74	225	16.7684	301.113	498.1	-27.94	7.81877	-1.35
144	Bola Oeste	Armeria caespitosa	2.97151	12.18	285	15.9631	306.503	467.588	-29.95	10.0882	-1.84
145	Bola Oeste	Armeria caespitosa	3.88821	10.66	252	16.3522	300.407	482.486	-30.05	13.0752	-2.11
146	Bola Oeste	Armeria caespitosa	4.22418	10.63	205	13.6128	331.237	479.139	-28.73	11.0302	-1.31
147	Bola Oeste	Armeria caespitosa	2.70086	14.84	220	16.6225	294.352	470.551	-29.22	8.49176	-2.39
148	Bola Oeste	Armeria caespitosa	2.12399	11.42	265	17.4009	324.174	470.526	-28.6	13.4385	-2.44
149	Bola Oeste	Armeria caespitosa	4.22208	13.17	237	13.6581	387.393	432.813	-28.25	10.628	-2.47
1410	Bola Oeste	Armeria caespitosa	1.71045	10.32	239	15.0256	316.476	484.522	-29.91	13.7423	-2.94
151	Bola Oeste	Jasione crispa	13.4623	11.62	200	24.0726	189.076	448.47	-29.53	20.1796	0
152	Bola Oeste	Jasione crispa	7.39906	8.84	245	15.4661	228.901	442.399	-26.9	17.2993	-1.98
153	Bola Oeste	Jasione crispa	21.7642	11.57	210	20.4011	209.198	434.033	-29.05	17.1624	-2.36
154	Bola Oeste	Jasione crispa	11.3237	17	237	16.3379	224.098	444.547	-28.76	15.3203	-0.7
155	Bola Oeste	Jasione crispa	18.7543	10.35	205	18.7942	237.043	459.885	-29.37	17.9559	-1.13
156	Bola Oeste	Jasione crispa	27.4452	7.78	255	14.5424	242.924	445.553	-28.53	18.0555	-2.69
157	Bola Oeste	Jasione crispa	7.37614	11.55	190	19.6412	203.059	445.062	-30.24	17.696	-1.66
158	Bola Oeste	Jasione crispa	15.7815	7.78	210	16.1785	249.046	437.652	-29.08	16.4048	-1.81
159	Bola Oeste	Jasione crispa	10.887	11.57	187	16.7099	223.338	444.822	-28.32	16.7122	-1.87
1510	Bola Oeste	Jasione crispa	7.96681	15.43	152	20.3746	212.712	451.324	-29.58	17.4049	-1.3
161	Bola Oeste	Minuartia recurva	17.4579	13.82	45	18.5628	402.668	447.786	-29.13	11.8442	-2.18
162	Bola Oeste	Minuartia recurva	9.23675	14.74	112	15.9383	367.716	455.35	-28.01	18.4843	-3.25
163	Bola Oeste	Minuartia recurva	18.4787	10.4	87	19.6027	343.96	457.554	-29.03	18.3801	-3.38
164	Bola Oeste	Minuartia recurva	3.73934	13.4	110	16.4275	317.788	447.182	-29.01	16.7144	-3
165	Bola Oeste	Minuartia recurva	96.9926	23.38	80	22.7198	311.152	439.439	-28.45	16.6998	-3.54
166	Bola Oeste	Minuartia recurva	8.53418	17.98	98	16.5956	359.498	424.222	-29.73	15.8929	-3.33
167	Bola Oeste	Minuartia recurva	10.2375	15.21	100	15.5353	344.188	446.742	-30.07	17.4638	-3.91
168	Bola Oeste	Minuartia recurva	6.02863	10.36	77	20.5582	397.569	464.118	-28.06	18.4922	-1.42
169	Bola Oeste	Minuartia recurva	8.6795	16.87	77	20.7237	349.895	464.221	-30.57	15.8091	-3.96
1610	Bola Oeste	Minuartia recurva	16.3928	14.41	130	17.4516	298.093	452.626	-27.89	19.3582	-1.14
171	Bola Oeste	Festuca curvifolia	9.98347	29.11	520	4.84574	423.454	496.202	-25.93	11.6208	-1.85
172	Bola Oeste	Festuca curvifolia	79.559	32.81	440	5.28866	402.381	497.954	-24.81	13.3388	0.83
173	Bola Oeste	Festuca curvifolia	56.3262	38.39	525	4.41412	542.751	512.341	-25.93	14.2668	0.4
174	Bola Oeste	Festuca curvifolia	58.5611	80.33	515	5.10763	347.073	505.136	-26.07	12.1982	-2.08
175	Bola Oeste	Festuca curvifolia	94.8753	36.8	490	5.0547	442.546	515.795	-25.93	13.9909	-0.62
176	Bola Oeste	Festuca curvifolia	10.1239	13.74	525	4.03716	495.907	504.482	-25.37	11.7546	-0.68
177	Bola Oeste	Festuca curvifolia	74.0214	43.02	540	4.22454	435.601	500.707	-26.55	13.9497	0.14
178	Bola Oeste	Festuca curvifolia	37.3903	41.41	620	4.3818	498.413	513.084	-25.96	9.61051	2.13
179	Bola Oeste	Festuca curvifolia	47.0995	32.22	565	4.46551	447.78	516.314	-24.14	14.0037	-1.12
1710	Bola Oeste	Festuca curvifolia	29.5681	27.73	450	4.81295	480.393	510.177	-25.96	8.67679	-1.49
191	Bola Oeste	Juniperus communis subsp. alpina	83880.5	220	485	6.11755	451.995	506.044	-25.56	6.14621	-2.9
192	Bola Oeste	Juniperus communis subsp. alpina	34827.7	250	445	5.52781	505.019	529.041	-25.59	9.85502	-3.82
193	Bola Oeste	Juniperus communis subsp. alpina	104351	400	425	5.61717	490.384	506.912	-26.03	14.6704	-1
194	Bola Oeste	Juniperus communis subsp. alpina	115709	350	400	5.76135	465.686	525.016	-26.05	9.2899	-2.64
195	Bola Oeste	Juniperus communis subsp. alpina	21763.4	190	300	5.80668	489.377	512.163	-26.4	8.63709	-4.7
196	Bola Oeste	Juniperus communis subsp. alpina	142079	220	285	4.90555	509.201	532.023	-26.17	10.6438	-3.76
197	Bola Oeste	Juniperus communis subsp. alpina	48380.5	190	300	5.49622	477.575	508.753	-27	9.64784	-4.08
198	Bola Oeste	Juniperus communis subsp. alpina	48949.9	190	425	4.78625	503.852	521.85	-26.15	13.4187	-5.24
199	Bola Oeste	Juniperus communis subsp. alpina	137837	210	495	5.30053	499.304	510.45	-25.78	14.2436	-2.83
1910	Bola Oeste	Juniperus communis subsp. alpina	58904.9	320	515	4.88466	452.772	504.803	-26.8	9.87675	0.07
1101	Bola Oeste	Silene ciliata	80.7656	21.04	338	15.1612	200.667	402.356	-29.2	17.9266	-1.32
1102	Bola Oeste	Silene ciliata	34.0804	14.99	325	13.8238	222.231	439.238	-26.39	14.6431	-1.21
1103	Bola Oeste	Silene ciliata	30.4031	17.35	330	15.6871	210.28	450.992	-28.15	20.4179	-1.88
1104	Bola Oeste	Silene ciliata	14.4476	25.07	392	14.3279	239.998	458.53	-27.66	18.732	-1.14
1105	Bola Oeste	Silene ciliata	28.3556	17.45	399	16.3582	173.972	425.834	-28.89	17.1378	-0.4
1106	Bola Oeste	Silene ciliata	6.48801	16.05	409	16.1592	188.094	452.939	-28.41	19.9949	-0.57
1107	Bola Oeste	Silene ciliata	21.5896	23.73	415	14.9765	218.787	440.969	-27.66	22.3305	4.29
1108	Bola Oeste	Silene ciliata	11.2853	19.91	423	13.0968	198.772	447.717	-27.66	24.6135	-0.76
1109	Bola Oeste	Silene ciliata	18.8514	14.62	428	14.9307	196.313	432.108	-28.51	21.1786	0.58
11010	Bola Oeste	Silene ciliata	20.6921	24.14	409	15.1809	225.046	396.993	-27.4	17.5999	-0.41
211	Navacerrada	Jurinea humilis	15.8678	7.24	240	10.2647	266.846	483.998	-29	17.9509	-0.62
212	Navacerrada	Jurinea humilis	53.537	4.48	262	10.8166	206.404	458.097	-28.48	16.279	-0.81
213	Navacerrada	Jurinea humilis	26.8771	7.61	247	12.4142	199.256	458.14	-29.1	28.1309	0.91
214	Navacerrada	Jurinea humilis	13.8845	5.15	237	9.77204	235.512	464.713	-29.72	18.4257	-1.01
215	Navacerrada	Jurinea humilis	15.2779	4.33	217	8.5311	275.488	455.148	-27.83	13.6946	0.69
216	Navacerrada	Jurinea humilis	18.4406	6.67	260	12.0661	204.09	469.79	-29.42	27.1815	2.56
217	Navacerrada	Jurinea humilis	13.6428	6.72	225	9.47108	275.66	465.433	-29	19.2453	1.56
218	Navacerrada	Jurinea humilis	29.7895	5.24	240	8.72801	275.034	470.629	-29.38	18.1764	-1.4
219	Navacerrada	Jurinea humilis	23.3133	6.08	252	8.62713	309.88	467.554	-29.36	17.7106	-1.65
2110	Navacerrada	Jurinea humilis	21.0257	8.09	260	10.5492	247.715	464.508	-29.4	17.9402	-2.72
221	Navacerrada	Deschampsia flexuosa	33.7702	15.03	215	7.5914	450.686	448.291	-27.77	9.38342	-0.45
222	Navacerrada	Deschampsia flexuosa	203.234	24.13	225	9.38614	363.504	445.171	-27.33	11.931	0.83
223	Navacerrada	Deschampsia flexuosa	23.4573	24.59	250	6.97022	427.369	443.597	-25.56	9.58406	2.04
224	Navacerrada	Deschampsia flexuosa	8.00541	23.19	265	6.8838	403.487	457.598	-27.54	11.3211	0.57
225	Navacerrada	Deschampsia flexuosa	20.0182	18.41	200	9.38812	404.72	457.613	-26.67	10.706	-0.11
226	Navacerrada	Deschampsia flexuosa	108.917	15.53	285	7.25169	426.32	451.033	-25.79	10.054	1.06
227	Navacerrada	Deschampsia flexuosa	18.7586	18.35	325	7.51114	401.03	461.554	-26.72	13.4552	0.84
228	Navacerrada	Deschampsia flexuosa	25.2722	16.63	270	8.60176	364.296	456.763	-26.53	10.8525	0.45
229	Navacerrada	Deschampsia flexuosa	19.6263	16.13	290	8.14122	411.819	451.282	-27.63	9.57467	0.23
2210	Navacerrada	Deschampsia flexuosa	20.6047	20.32	240	9.04371	351.224	458.132	-26.89	14.7167	-0.17
231	Navacerrada	Armeria caespitosa	1.97864	10.91	215	15.9852	357.283	506.542	-29.91	13.515	-0.86
232	Navacerrada	Armeria caespitosa	18.5197	22.85	210	19.411	295.811	489.545	-30.03	18.3683	0.97
233	Navacerrada	Armeria caespitosa	30.5954	25.85	225	16.7246	341.269	470.99	-29.43	16.0579	1.19
234	Navacerrada	Armeria caespitosa	15.3921	19.84	200	20.1301	320.797	488.388	-30.59	16.4147	0.1
235	Navacerrada	Armeria caespitosa	3.21009	13.86	246	13.8455	374.898	479.139	-30.12	11.206	0.47
236	Navacerrada	Armeria caespitosa	6.80952	15.23	185	16.9911	399.469	484.968	-29.38	11.7735	-2.44
237	Navacerrada	Armeria caespitosa	22.0761	14.35	249	14.7058	382.101	494.333	-30.65	19.1627	-2.39
238	Navacerrada	Armeria caespitosa	4.12565	13.24	289	12.6489	343.188	471.094	-30.55	8.58221	-0.1
239	Navacerrada	Armeria caespitosa	6.0765	11.51	246	15.9552	331.562	490.524	-30.47	12.8609	1.04
2310	Navacerrada	Armeria caespitosa	9.57478	13.06	255	14.256	381.118	504.053	-28.86	14.2157	-0.22
241	Navacerrada	Agrostis delicatula	23.7713	21.47	286	9.85391	368.091	479.138	-28.95	21.1805	1.1
242	Navacerrada	Agrostis delicatula	50.4675	28.28	215	10.8886	348.556	458.077	-28.22	10.4997	0.69
243	Navacerrada	Agrostis delicatula	46.2937	27.1	233	10.4274	371.348	453.823	-28.06	10.6314	-0.27
244	Navacerrada	Agrostis delicatula	35.7725	30.19	226	10.8106	359.131	437.095	-28.84	12.9829	3.43
245	Navacerrada	Agrostis delicatula	54.3679	23.66	430	9.53324	373.956	453.135	-26.9	12.2739	0.77
246	Navacerrada	Agrostis delicatula	59.9281	24.19	204	12.5836	342.786	452.939	-28.03	14.9519	0.35
247	Navacerrada	Agrostis delicatula	33.223	14.27	171	14.581	311.667	450.336	-28.52	16.5881	1.27
248	Navacerrada	Agrostis delicatula	53.9562	29.2	198	14.449	291.411	448.384	-27.32	16.2343	0.93
249	Navacerrada	Agrostis delicatula	46.8827	28.46	240	12.1935	332.51	452.629	-27.82	18.9065	0.16
2410	Navacerrada	Agrostis delicatula	30.4722	23.62	158	14.8496	330.189	441.283	-28.55	18.356	0.71
251	Navacerrada	Festuca curvifolia	70.2738	46.87	458	4.65443	483.813	458.064	-27.45	7.10449	-1.97
252	Navacerrada	Festuca curvifolia	23.6751	27.67	464	6.04527	358.716	498.938	-26.89	18.2965	-0.266
253	Navacerrada	Festuca curvifolia	56.2308	33.36	501	4.75937	428.834	497.382	-27.23	11.761	1.43
254	Navacerrada	Festuca curvifolia	141.003	36.14	441	4.73481	446.924	496.983	-27.18	14.1827	0.51
255	Navacerrada	Festuca curvifolia	82.5941	29.39	397	4.89452	459.234	489.598	-27.65	9.39974	-0.07
256	Navacerrada	Festuca curvifolia	85.6163	17.34	404	4.71779	438.852	489.491	-26.94	12.7642	-0.63
257	Navacerrada	Festuca curvifolia	17.905	53.51	493	4.31132	446.697	494.101	-26.85	14.049	-0.49
258	Navacerrada	Festuca curvifolia	103.422	34.79	568	4.48527	426.141	493.093	-27.68	13.0743	0.07
259	Navacerrada	Festuca curvifolia	7.01268	22	485	4.60229	435.615	490.697	-26.15	16.8066	-0.24
2510	Navacerrada	Festuca curvifolia	46.9301	29.69	526	4.0411	481.053	490.504	-26.06	14.4754	-1.01
261	Navacerrada	Pilosella vahlii	26.4403	22.48	233	12.4122	265.735	454.706	-27.55	20.2169	-1.66
262	Navacerrada	Pilosella vahlii	17.5968	37.42	172	14.8241	246.73	466.011	-27.48	17.3613	-2.22
263	Navacerrada	Pilosella vahlii	17.2177	28.09	204	13.0328	256.979	467.992	-28.04	24.8492	0.61
264	Navacerrada	Pilosella vahlii	16.1283	13.01	161	13.081	301.77	469.421	-27.39	23.0838	0.66
265	Navacerrada	Pilosella vahlii	6.14915	5.51	190	15.6586	237.996	455.246	-27.64	20.5556	-0.1
266	Navacerrada	Pilosella vahlii	23.0626	7.82	231	12.8584	305.963	455.534	-26.87	26.355	-0.2
267	Navacerrada	Pilosella vahlii	18.062	45.33	175	15.4952	223.166	452.559	-28.11	25.5613	-2.88
268	Navacerrada	Pilosella vahlii	21.8155	33.61	226	13.5466	246.706	458.312	-27.34	24.7225	-3.01
269	Navacerrada	Pilosella vahlii	36.9424	14.09	213	12.0876	271.087	463.796	-27.1	22.4898	-0.22
2610	Navacerrada	Pilosella vahlii	56.0836	15.75	194	14.7825	262.464	459.983	-27.44	31.4134	0.9
271	Navacerrada	Juniperus communis subsp. alpina	231319	153	399	5.88653	485.23	518.753	-25.48	16.3053	-2.46
272	Navacerrada	Juniperus communis subsp. alpina	553215	286	391	5.76541	475.239	515.083	-26.03	14.2839	0.06
273	Navacerrada	Juniperus communis subsp. alpina	100610	226	499	5.11494	450.061	516.344	-25.01	11.7103	0.35
274	Navacerrada	Juniperus communis subsp. alpina	377777	210	361	5.85839	467.648	498.44	-25.21	14.7635	-0.51
275	Navacerrada	Juniperus communis subsp. alpina	41908.8	276	687	5.56198	409.092	495.174	-24.78	12.4783	-0.55
276	Navacerrada	Juniperus communis subsp. alpina	285571	350	392	4.88905	507.24	532.434	-26.87	13.7878	-1.31
277	Navacerrada	Juniperus communis subsp. alpina	953788	323	375	4.93573	495.018	517.522	-27.85	9.12602	0.01
278	Navacerrada	Juniperus communis subsp. alpina	435425	166	437	5.68278	452.469	501.236	-26.75	15.5099	1.59
279	Navacerrada	Juniperus communis subsp. alpina	124407	210	453	5.20516	467.783	528.843	-26.23	9.81389	-0.35
2710	Navacerrada	Juniperus communis subsp. alpina	252320	363	299	8.4601	360.719	493.511	-25.82	13.2206	-1.19
311	Collado de la Tirobarra	Festuca curvifolia	107.013	21.96	394	5.70221	446.444	502.899	-26.32	13.3646	-1.7
312	Collado de la Tirobarra	Festuca curvifolia	143.636	42.88	604	3.77003	446.739	492.518	-26.32	12.805	-3.18
313	Collado de la Tirobarra	Festuca curvifolia	131.652	30.6	530	4.12504	438.351	505.033	-26.46	10.51	-0.93
314	Collado de la Tirobarra	Festuca curvifolia	54.4312	19.69	529	5.14658	405.266	496.7	-26.76	14.8809	-1.53
315	Collado de la Tirobarra	Festuca curvifolia	55.386	24.98	550	4.64106	432.42	498.92	-27.52	12.2134	-1.57
316	Collado de la Tirobarra	Festuca curvifolia	47.9824	29.24	508	4.60905	448.444	508.235	-26.35	15.2551	-3.3
317	Collado de la Tirobarra	Festuca curvifolia	47.8516	32.95	572	3.71856	462.065	496.727	-26.65	12.2994	-2.23
318	Collado de la Tirobarra	Festuca curvifolia	27.5001	36.26	531	3.98747	492.942	498.693	-26.47	8.50667	-3.64
319	Collado de la Tirobarra	Festuca curvifolia	75.6768	34.03	470	4.86884	427.037	486.365	-28.37	11.1917	-0.16
3110	Collado de la Tirobarra	Festuca curvifolia	75.3252	24.92	492	4.31204	488.089	496.854	-26.79	13.826	-2.92
321	Collado de la Tirobarra	Deschampsia flexuosa	114.074	38.59	287	8.14541	411.604	476.489	-25.92	14.3758	-2.51
322	Collado de la Tirobarra	Deschampsia flexuosa	75.6373	49.76	302	6.40545	401.322	459.635	-26.48	11.7783	-1.35
323	Collado de la Tirobarra	Deschampsia flexuosa	93.5189	46.38	353	6.3199	399.284	450.194	-26.9	7.43116	-2.11
324	Collado de la Tirobarra	Deschampsia flexuosa	162.826	22.13	258	9.18306	371.659	459.266	-27.28	13.6303	-0.57
325	Collado de la Tirobarra	Deschampsia flexuosa	296.079	30.18	284	7.35701	421.633	452.141	-25.76	6.26706	-2.44
326	Collado de la Tirobarra	Deschampsia flexuosa	95.7473	28.59	256	9.56325	379.088	446.295	-27.47	8.62688	-3.67
327	Collado de la Tirobarra	Deschampsia flexuosa	388.584	31.96	303	6.45786	422.216	459.802	-25.05	10.9462	-2.97
328	Collado de la Tirobarra	Deschampsia flexuosa	326.349	33.14	199	8.01377	424.863	453.911	-26.44	8.86171	-2.42
329	Collado de la Tirobarra	Deschampsia flexuosa	155.16	31.05	271	9.74821	331.579	460.075	-26.89	13.7839	-1.18
3210	Collado de la Tirobarra	Deschampsia flexuosa	296.551	28.89	359	6.12083	436.117	459.663	-26.31	12.1047	-2.15
331	Collado de la Tirobarra	Jurinea humilis	56.6056	6.31	223	12.569	231.21	481.859	-29.31	22.5806	-2.17
332	Collado de la Tirobarra	Jurinea humilis	26.3167	6.39	213	8.99945	279.629	474.899	-27.35	20.2846	-0.15
333	Collado de la Tirobarra	Jurinea humilis	41.9361	5.82	233	8.236	277.855	479.399	-27.8	22.9403	0.63
334	Collado de la Tirobarra	Jurinea humilis	40.3849	8.03	220	7.78554	311.752	494.48	-29.14	18.6561	-2.32
335	Collado de la Tirobarra	Jurinea humilis	20.299	7.44	232	12.8364	233.623	473.64	-27.91	19.2824	-2.52
336	Collado de la Tirobarra	Jurinea humilis	25.2689	7	204	10.54	249.176	487.993	-28.43	18.7228	-1.74
337	Collado de la Tirobarra	Jurinea humilis	19.3066	6.87	242	10.385	264.214	486.37	-29.82	18.5493	-1.3
338	Collado de la Tirobarra	Jurinea humilis	57.2105	6.9	265	9.68131	228.328	478.648	-27.64	18.5945	0.19
339	Collado de la Tirobarra	Jurinea humilis	32.1114	6.93	271	10.9126	254.781	490.628	-28.64	22.8297	-0.24
3310	Collado de la Tirobarra	Jurinea humilis	60.2196	5.53	284	10.6783	209.605	465.203	-28.24	20.7316	-3.02
341	Collado de la Tirobarra	Agrostis delicatula	14.0099	25.83	182	10.2381	400.089	450.505	-27.68	7.85354	-1.75
342	Collado de la Tirobarra	Agrostis delicatula	52.6965	28.43	160	11.007	378.277	462.875	-26.83	28.425	9.07
343	Collado de la Tirobarra	Agrostis delicatula	71.9986	28.01	173	9.66336	428.577	455.335	-27.25	8.61004	-3.57
344	Collado de la Tirobarra	Agrostis delicatula	24.2742	26.33	165	9.3821	532.276	454.252	-25.41	7.1805	-0.15
345	Collado de la Tirobarra	Agrostis delicatula	28.6327	31.24	150	13.4136	357.093	447.398	-29.23	19.3605	2.02
346	Collado de la Tirobarra	Agrostis delicatula	31.3503	23.51	253	7.72249	467.463	450.349	-27.24	5.03461	-2.55
347	Collado de la Tirobarra	Agrostis delicatula	13.7757	19.24	173	11.9354	437.825	449.739	-27.58	11.8419	-1.78
348	Collado de la Tirobarra	Agrostis delicatula	10.5348	22.3	179	11.8516	386.041	447.376	-28.71	11.5511	-1.31
349	Collado de la Tirobarra	Agrostis delicatula	30.5869	17.13	155	12.3341	295.347	450.47	-28.22	11.37	-2.39
3410	Collado de la Tirobarra	Agrostis delicatula	26.603	32.65	234	9.1247	432.593	448.483	-27.11	7.95938	-2.68
351	Collado de la Tirobarra	Pilosella vahlii	11.0126	28.62	215	16.1466	227.162	459.744	-27.89	18.1685	-1.21
352	Collado de la Tirobarra	Pilosella vahlii	49.518	32.87	210	22.5322	156.869	436.33	-29.22	21.685	-2.8
353	Collado de la Tirobarra	Pilosella vahlii	19.5719	43.14	254	14.4364	208.032	438.25	-28.48	15.487	-3.32
354	Collado de la Tirobarra	Pilosella vahlii	14.148	23.45	238	15.0271	238.227	448.674	-27.54	15.1939	-3.86
355	Collado de la Tirobarra	Pilosella vahlii	15.013	33.49	316	13.1634	226.958	448.353	-27.25	17.0827	-2.97
356	Collado de la Tirobarra	Pilosella vahlii	17.9534	22.51	260	13.8921	228.774	449.781	-26.61	15.1799	-3.2
357	Collado de la Tirobarra	Pilosella vahlii	17.2891	19.49	269	14.0184	223.577	449.899	-27.64	16.3009	-2.8
358	Collado de la Tirobarra	Pilosella vahlii	8.29952	14.69	279	13.0463	254.076	448.062	-28.94	18.1407	-3.35
359	Collado de la Tirobarra	Pilosella vahlii	15.2279	14.9	221	23.5606	177.234	448.626	-28.64	15.8113	-1.84
3510	Collado de la Tirobarra	Pilosella vahlii	23.0394	32.27	237	12.09	284.028	432.839	-26.74	12.8581	-2.65
361	Collado de la Tirobarra	Juniperus communis subsp. alpina	118675	250	327	8.69069	359.183	498.661	-25.76	12.3156	-1.84
362	Collado de la Tirobarra	Juniperus communis subsp. alpina	76020.3	300	344	7.73022	396.518	484.211	-23.64	16.8941	-1.34
363	Collado de la Tirobarra	Juniperus communis subsp. alpina	84441.3	270	396	5.72016	497.524	513.192	-26.18	8.73837	-2.69
364	Collado de la Tirobarra	Juniperus communis subsp. alpina	124509	270	372	6.81386	406.166	500.851	-25.26	8.84013	-3.48
365	Collado de la Tirobarra	Juniperus communis subsp. alpina	17537.9	300	449	4.78503	512.204	539.087	-26.25	8.05055	-2.71
366	Collado de la Tirobarra	Juniperus communis subsp. alpina	88938.5	460	448	5.30954	469.154	507.613	-25.29	11.0426	-2.38
367	Collado de la Tirobarra	Juniperus communis subsp. alpina	48865.1	200	484	6.17924	386.827	500.774	-24.88	11.0774	-3.52
368	Collado de la Tirobarra	Juniperus communis subsp. alpina	34459.3	200	331	7.31225	399.11	485.076	-23.9	12.6445	-2.11
369	Collado de la Tirobarra	Juniperus communis subsp. alpina	56605.2	150	462	5.4916	491.442	496.454	-26.57	8.7737	-2.23
3610	Collado de la Tirobarra	Juniperus communis subsp. alpina	21563.1	150	330	7.73883	394.559	492.813	-25.7	10.2968	-0.05
371	Collado de la Tirobarra	Armeria caespitosa	6.31062	14.28	193	13.3632	405.678	520.535	-28.14	16.9558	-1.67
372	Collado de la Tirobarra	Armeria caespitosa	3.89014	13.3	237	15.3451	354.435	505.413	-29.06	18.6654	-0.82
373	Collado de la Tirobarra	Armeria caespitosa	4.19556	12.98	265	12.0454	363.991	497.296	-29.2	7.92246	-1.42
374	Collado de la Tirobarra	Armeria caespitosa	9.43976	14.6	191	13.0129	352.913	503.153	-29.61	10.5382	-2.61
375	Collado de la Tirobarra	Armeria caespitosa	7.40782	13.42	257	10.3628	339.319	499.555	-29.22	9.23077	-1.06
376	Collado de la Tirobarra	Armeria caespitosa	2.37355	11.69	172	16.9961	342.593	497.778	-29.96	9.45019	-2.03
377	Collado de la Tirobarra	Armeria caespitosa	4.28345	15.3	213	13.319	381.925	492.503	-29.4	11.66	0.05
378	Collado de la Tirobarra	Armeria caespitosa	5.54985	13.94	217	13.3766	371.452	499.555	-29.2	9.36709	-3.03
379	Collado de la Tirobarra	Armeria caespitosa	3.61464	12.37	207	13.6494	320.406	498.697	-29.93	15.4914	0.67
3710	Collado de la Tirobarra	Armeria caespitosa	4.18088	15.14	179	14.9168	353.683	500.685	-30.04	18.4764	-1.51
381	Collado de la Tirobarra	Silene ciliata	44.0818	22.57	252	16.3755	172.104	441.524	-29.26	26.3341	1.69
382	Collado de la Tirobarra	Silene ciliata	52.6997	30.1	311	14.4678	175.142	444.787	-28.19	26.8313	-0.91
383	Collado de la Tirobarra	Silene ciliata	49.265	27.51	303	12.6012	207.563	446.4	-27.83	23.6905	0.22
384	Collado de la Tirobarra	Silene ciliata	147.47	23.18	219	17.1456	213.421	415.309	-29.07	20.0683	-2.02
385	Collado de la Tirobarra	Silene ciliata	109.967	21.08	242	17.1109	202.201	456.653	-27.11	26.4851	0.28
386	Collado de la Tirobarra	Silene ciliata	104.226	24.46	240	13.3162	194.259	453.981	-27.67	24.4234	-1.1
387	Collado de la Tirobarra	Silene ciliata	47.6979	24.41	285	14.5329	176.624	421.835	-27.71	21.1687	0.82
388	Collado de la Tirobarra	Silene ciliata	55.9241	27.2	249	16.6641	183.388	440.009	-29.18	22.6104	0.32
389	Collado de la Tirobarra	Silene ciliata	32.479	23.61	260	15.1285	179.685	425.797	-29.2	31.4732	3.43
3810	Collado de la Tirobarra	Silene ciliata	72.2913	23.43	287	16.1931	163.933	416.969	-28.04	28.5507	1.09
391	Collado de la Tirobarra	Jasione crispa	63	22.04	142	25.0858	204.39	457.826	-30.84	24	-3.37
392	Collado de la Tirobarra	Jasione crispa	5.1689	13.74	162	15.8305	250.245	444.057	-30.11	20.2657	-3.77
393	Collado de la Tirobarra	Jasione crispa	77.3508	22.75	150	25.5724	190.266	457.678	-30.4	24.4154	-3.64
394	Collado de la Tirobarra	Jasione crispa	69.6294	25.95	116	23.5974	226.993	456.201	-31.38	24.5029	-2.23
395	Collado de la Tirobarra	Jasione crispa	10.8593	14.71	153	18.4705	262.101	447.983	-30.13	14.6696	-1.28
396	Collado de la Tirobarra	Jasione crispa	10.2025	12.77	122	18.8841	244.571	444.191	-32.45	17.0627	0.44
397	Collado de la Tirobarra	Jasione crispa	8.83273	14.45	166	14.9171	271.901	449.34	-29.69	19.2919	-2.86
398	Collado de la Tirobarra	Jasione crispa	4.99059	20.99	231	14.7173	246.622	449.893	-29.56	19.6983	-0.9
399	Collado de la Tirobarra	Jasione crispa	32.2701	18.57	201	14.9377	260.239	460.753	-28.28	21.9633	-1.06
3910	Collado de la Tirobarra	Jasione crispa	29.4683	27.82	182	14.6396	260.048	453.995	-28.93	20.6895	0.94
3101	Collado de la Tirobarra	Senecio carpetanus	103.366	380	394	9.91252	212.539	445.829	-28.35	30.2187	-2.96
3102	Collado de la Tirobarra	Senecio carpetanus	207.157	503	364	10.4222	197.049	475.645	-28.31	43.9593	-2.59
3103	Collado de la Tirobarra	Senecio carpetanus	112.147	428	345	9.98655	217.73	468.463	-28.97	37.964	-2.57
3104	Collado de la Tirobarra	Senecio carpetanus	46.4563	227	544	7.56449	216.002	451.247	-28.31	31.9435	-1.67
3105	Collado de la Tirobarra	Senecio carpetanus	49.1973	225	416	10.0751	189.74	445.448	-29.8	27.0374	-1.02
3106	Collado de la Tirobarra	Senecio carpetanus	33.8664	218	474	10.3623	174.917	436.543	-29.2	30.9026	-1.32
3107	Collado de la Tirobarra	Senecio carpetanus	38.4531	138	403	10.714	209.648	464.134	-29.15	30.2438	3.06
3108	Collado de la Tirobarra	Senecio carpetanus	77.613	437	528	9.74954	179.33	454.719	-28.18	41.8182	-2.52
3109	Collado de la Tirobarra	Senecio carpetanus	94.1221	417	369	12.9588	176.448	464.863	-29.26	39.9507	-2.36
31010	Collado de la Tirobarra	Senecio carpetanus	40.9978	245	489	9.58706	184.938	445.465	-30.53	30.8268	1.35
411	Citores	Festuca curvifolia	74.7147	36.99	664	4.03958	458.26	457.849	-26.43	11.0554	-1.82
412	Citores	Festuca curvifolia	146.645	34.41	520	4.63481	424.177	501.002	-26.67	11.4939	0.64
413	Citores	Festuca curvifolia	60.6911	35.56	608	4.56365	415.662	492.154	-26.6	14.5753	-0.14
414	Citores	Festuca curvifolia	31.5693	31.16	676	4.03624	466.219	490.658	-25.84	11.2719	-1.54
415	Citores	Festuca curvifolia	52.0925	32.16	503	4.49345	470.327	496.906	-25.86	12.7419	2.74
416	Citores	Festuca curvifolia	15.4992	30.55	515	4.86567	442.745	488.751	-25.93	13.5799	0.71
417	Citores	Festuca curvifolia	303.804	36.68	541	4.3641	470.481	493.714	-27.18	14.7202	0.05
418	Citores	Festuca curvifolia	64.5986	29.82	587	4.68625	423.594	498.312	-26.03	11.5492	1.01
419	Citores	Festuca curvifolia	23.6283	19.68	485	4.83302	435.062	500.02	-25.72	14.0039	-0.29
4110	Citores	Festuca curvifolia	203.603	25.87	432	5.79686	416.204	494.904	-26.66	12.6137	1.83
421	Citores	Agrostis delicatula	24.1931	14.28	204	9.45992	426.658	451.086	-27.99	11.772	-1.63
422	Citores	Agrostis delicatula	19.8433	10.37	253	8.35106	471.522	465.281	-28.66	13.1327	-1.4
423	Citores	Agrostis delicatula	17.9744	17.28	218	12.4945	361.588	449.717	-28.84	10.3682	-1.6
424	Citores	Agrostis delicatula	19.3515	25.75	213	12.5021	374.617	451.64	-27.5	13.3378	1.46
425	Citores	Agrostis delicatula	11.2919	8.88	217	11.4925	389.166	440.08	-28.41	15.0852	1.21
426	Citores	Agrostis delicatula	19.7172	21.2	166	12.1474	416.76	452.505	-28.68	12.2321	-0.37
427	Citores	Agrostis delicatula	31.2266	26.06	184	10.7043	425.404	450.166	-27.87	9.74902	-3.59
428	Citores	Agrostis delicatula	25.5766	16.63	211	10.4884	390.619	449.087	-28.21	9.96474	-4.09
429	Citores	Agrostis delicatula	25.5312	15.62	165	13.4982	409.823	447.892	-26.17	10.607	-3.75
4210	Citores	Agrostis delicatula	62.4476	47.39	235	9.09178	456.108	453.404	-27.63	11.4711	-2.58
431	Citores	Jurinea humilis	40.512	13.55	226	9.78835	256.095	466.467	-28.86	21.9717	1.04
432	Citores	Jurinea humilis	69.68	15.41	247	7.49237	322.098	472.272	-29.78	22.5927	-0.74
433	Citores	Jurinea humilis	88.0898	11.61	248	9.29048	284.71	476.18	-29.63	15.4247	-0.9
434	Citores	Jurinea humilis	61.7772	13.96	230	11.5471	279.909	481.55	-29.51	26.7801	-0.95
435	Citores	Jurinea humilis	77.0938	18.49	257	11.9994	263.227	489.265	-28.63	24.3382	-0.85
436	Citores	Jurinea humilis	45.4791	12.62	250	10.2062	276.159	466.462	-27.85	21.1531	-1.97
437	Citores	Jurinea humilis	38.2089	10.84	270	8.67771	292.341	479.363	-29.08	19.3916	-1.83
438	Citores	Jurinea humilis	24.5428	12.19	264	11.8947	290.601	484.273	-30.01	21.817	-0.94
439	Citores	Jurinea humilis	50.2333	11	253	11.1832	332.199	475.597	-30.08	24.9634	-2.32
4310	Citores	Jurinea humilis	96.1779	16.98	280	10.4004	286.419	476.575	-29.54	24.0611	-1.96
441	Citores	Pilosella vahlii	19.3257	18.32	261	18.258	201.638	448.325	-27.17	21.4479	-0.35
442	Citores	Pilosella vahlii	17.3255	15.72	228	17.9867	200.242	426.769	-29.28	12.6691	-0.27
443	Citores	Pilosella vahlii	24.2754	20.6	264	21.9725	157.35	442.754	-27.92	23.4803	-0.29
444	Citores	Pilosella vahlii	6.85177	23.41	317	15.6085	188.667	425.592	-27.02	19.3315	-0.97
445	Citores	Pilosella vahlii	5.68543	11.44	248	16.667	205.833	454.688	-25.98	25.6582	-0.03
446	Citores	Pilosella vahlii	22.1139	20.23	255	16.2624	200.441	462.363	-28.6	23.4729	-0.99
447	Citores	Pilosella vahlii	15.9288	19.54	314	15.4844	214.683	432.269	-27.26	20.3869	-0.83
448	Citores	Pilosella vahlii	8.24869	24.84	276	19.0967	182.347	435.085	-27.86	17.6861	-3.94
449	Citores	Pilosella vahlii	9.75727	14.34	307	15.0889	198.598	425.817	-26.86	15.798	-5.52
4410	Citores	Pilosella vahlii	5.52035	13.56	288	18.556	202.004	429.629	-27.54	14.6129	-1.53
451	Citores	Jasione crispa	25.7083	15.15	219	16.9618	221.436	453.024	-28.82	15.6965	-2.01
452	Citores	Jasione crispa	71.5982	11.64	130	22.8994	228.752	459.8	-28.66	21.6197	-3.58
453	Citores	Jasione crispa	70.042	20.29	186	22.2244	231.713	457.849	-29.15	19.5429	-2.99
454	Citores	Jasione crispa	22.8851	13.73	150	19.3759	259.318	464.769	-29.19	29.0964	1.76
455	Citores	Jasione crispa	26.5942	11.47	153	30.2778	190.838	461.136	-29.49	23.0316	1.73
456	Citores	Jasione crispa	25.7724	10.6	197	15.759	233.821	456.057	-29.07	16.3598	-0.85
457	Citores	Jasione crispa	25.1547	11.85	177	25.6719	187.231	455.041	-30.35	18.9415	-0.89
458	Citores	Jasione crispa	13.163	9.55	176	18.869	231.854	447.841	-28.48	19.311	-2.21
459	Citores	Jasione crispa	18.2346	11.95	185	16.128	256.612	454.767	-28.22	20.9088	-2.39
4510	Citores	Jasione crispa	13.4078	22.94	178	19.6813	237.616	452.766	-28.53	21.9987	-2.39
461	Citores	Armeria caespitosa	3.22017	13.04	202	13.8566	382.085	501.45	-28.95	15.0269	-2.36
462	Citores	Armeria caespitosa	12.2009	12.62	181	13.7998	361.379	495.105	-28.45	11.2475	-0.07
463	Citores	Armeria caespitosa	25.9821	27.17	251	13.0244	392.83	539.083	-29.82	14.1103	-0.47
464	Citores	Armeria caespitosa	10.1399	15.7	249	13.1143	372.66	470.7	-28.56	12.7385	-0.81
465	Citores	Armeria caespitosa	22.8161	23.59	194	17.6363	351.916	493.565	-30.76	14.5892	-1.96
466	Citores	Armeria caespitosa	13.8255	20.93	194	15.9845	385.916	501.534	-29.32	8.78642	-1.9
467	Citores	Armeria caespitosa	25.6979	20.22	195	15.823	363.863	489.701	-29.78	11.839	-0.72
468	Citores	Armeria caespitosa	8.75336	23.63	275	13.0073	373.891	501.019	-28.82	14.2904	-2.83
469	Citores	Armeria caespitosa	10.8565	16.15	222	15.1887	360.515	497.137	-30.25	12.5173	1.78
4610	Citores	Armeria caespitosa	12.1309	20.72	275	13.5878	361.497	518.343	-28.35	11.7909	1.08
471	Citores	Senecio carpetanus	15.1447	311	536	12.0997	156.275	424.875	-28.46	26.276	-0.68
472	Citores	Senecio carpetanus	23.3808	260.17	487	11.5515	166.973	431.276	-28.61	28.3212	2.07
473	Citores	Senecio carpetanus	16.3853	248	493	11.1678	169.527	426.673	-29.33	24.7205	2.06
474	Citores	Senecio carpetanus	25.1899	518	369	10.9328	220.134	459.144	-29.49	34.7877	-1.45
475	Citores	Senecio carpetanus	18.2429	264	525	9.64318	201.249	456.935	-30.3	29.3131	1.74
476	Citores	Senecio carpetanus	15.5281	338	533	8.19126	191.395	459.116	-27.13	37.0551	1.63
477	Citores	Senecio carpetanus	20.3239	294	582	8.5649	191.007	438.89	-28.67	30	3.92
478	Citores	Senecio carpetanus	10.6523	346	380	11.5786	187.498	439.564	-28.52	27.2173	1.61
479	Citores	Senecio carpetanus	22.3186	262	455	10.0843	180.13	446.869	-28.84	30.0253	2.38
4710	Citores	Senecio carpetanus	25.527	335	603	9.56268	176.841	455.362	-26.69	36.5329	5.03
481	Citores	Juniperus communis subsp. alpina	138048	243	408	6.07683	462.946	494.511	-23.41	20.5623	-1.97
482	Citores	Juniperus communis subsp. alpina	163559	266	418	5.90236	459.598	512.081	-26.32	11.4253	-1.31
483	Citores	Juniperus communis subsp. alpina	59886.6	196	439	5.46532	462.527	510.793	-26.34	13.1087	0.54
484	Citores	Juniperus communis subsp. alpina	309486	250	494	5.36078	485.081	523.933	-26.55	9.38795	-1.53
485	Citores	Juniperus communis subsp. alpina	195486	363	423	8.15731	346.859	503.915	-25.52	12.4813	-1.05
486	Citores	Juniperus communis subsp. alpina	64214.2	436	409	5.95157	458.006	525.089	-26.76	13.2079	-0.74
487	Citores	Juniperus communis subsp. alpina	143257	402	397	5.70604	476.458	526.826	-26.17	11.0998	-3.04
488	Citores	Juniperus communis subsp. alpina	43354	237	493	4.78644	473.872	516.384	-25.86	8.74277	0.19
489	Citores	Juniperus communis subsp. alpina	198077	353	466	5.63827	465.378	511.458	-25.53	6.94082	0.43
4810	Citores	Juniperus communis subsp. alpina	211005	386	427	4.94771	503.033	504.789	-26.03	8.42711	-0.79
491	Citores	Deschampsia flexuosa	178.673	23.79	195	8.92337	395.88	451.156	-28.06	8.16876	-4.48
492	Citores	Deschampsia flexuosa	146.484	25.66	258	8.76738	364.717	449.037	-27.67	9.28415	-3.63
493	Citores	Deschampsia flexuosa	103.029	28.07	315	7.38381	390.824	448.987	-27.66	10.1672	-3.04
494	Citores	Deschampsia flexuosa	1469.07	26.99	384	8.03885	416.827	449.32	-28.35	11.357	-2.63
495	Citores	Deschampsia flexuosa	584.713	23.93	304	9.17297	331.765	457.769	-27.64	14.3899	-0.7
496	Citores	Deschampsia flexuosa	112.092	20.08	334	7.73851	386.601	448.687	-27.41	10.0819	-1.17
497	Citores	Deschampsia flexuosa	152.276	21.05	336	5.83306	455.4	453.785	-28.04	11.3752	0.88
498	Citores	Deschampsia flexuosa	107.763	25.2	263	7.09463	394.998	458.21	-27.89	11.2003	-1.09
499	Citores	Deschampsia flexuosa	263.108	25.1	272	6.8192	414.377	456.503	-26.35	13.6237	-2.57
4910	Citores	Deschampsia flexuosa	31.4204	29.55	247	8.49594	392.497	453.725	-28.15	8.62916	-3.07
4101	Citores	Silene ciliata	76.4475	11.42	422	14.3249	172.447	443.362	-27.32	22.9264	-3.47
4102	Citores	Silene ciliata	55.3337	16.25	402	14.8632	180.328	434.493	-28.19	25.9572	-2.65
4103	Citores	Silene ciliata	32.772	16.64	475	15.496	169.773	434.829	-29.01	23.092	1.01
4104	Citores	Silene ciliata	108.663	20.05	270	13.8662	190.517	435.545	-26.09	32.1467	-0.42
4105	Citores	Silene ciliata	70.9153	15.68	458	12.3657	174.398	429.179	-27.34	19.0038	0.7
4106	Citores	Silene ciliata	51.1607	20.55	285	13.1622	206.425	452.417	-26.19	23.3365	-0.99
4107	Citores	Silene ciliata	17.5022	16.63	324	12.6444	204.889	440.449	-27.92	19.3885	-2.56
4108	Citores	Silene ciliata	72.6103	22.75	408	14.1195	183.067	453.456	-27.34	22.2078	-1.29
4109	Citores	Silene ciliata	42.081	19.5	307	15.7808	234.11	446.8	-27.32	25.7119	-2.05
41010	Citores	Silene ciliata	54.4798	18.81	321	13.6983	204.545	435.763	-27.74	22.4951	-0.37
511	La Najarra	Festuca curvifolia	39.34	25.28	523	4.94367	437.132	499.364	-28.04	11.2224	-0.91
512	La Najarra	Festuca curvifolia	20.9241	23.2	536	4.67556	419.311	492.431	-26.64	16.8519	0.78
513	La Najarra	Festuca curvifolia	132.779	25.7	530	4.60022	453.793	503.227	-27.36	16.6183	-0.53
514	La Najarra	Festuca curvifolia	141.293	27.41	530	4.4795	459.743	499.167	-27.19	16.9399	-1.22
515	La Najarra	Festuca curvifolia	5.30488	26.39	476	4.93336	415.834	498.283	-28.34	23.5515	1.4
516	La Najarra	Festuca curvifolia	45.6688	24.63	507	4.76504	448.484	496.357	-27.49	21.5223	-1.32
517	La Najarra	Festuca curvifolia	64.0626	23.82	545	4.25221	461.557	499.424	-26.86	19.6455	-0.27
518	La Najarra	Festuca curvifolia	36.5259	20.3	578	4.77952	409.384	496.919	-26.64	20.1826	-1.12
519	La Najarra	Festuca curvifolia	449.939	25.57	572	5.02747	399.848	495.772	-26.98	17.0694	-0.75
5110	La Najarra	Festuca curvifolia	39.8618	23.7	575	4.7328	432.665	492.757	-25.85	18.1097	1.03
521	La Najarra	Jasione crispa	71.7877	14.81	200	17.7931	253.243	468.583	-27.85	23.4238	-1.2
522	La Najarra	Jasione crispa	52.1143	17.88	225	16.084	252.565	464.368	-28.45	21.1623	-0.09
523	La Najarra	Jasione crispa	23.7275	8.51	229	15.0706	260.02	469.506	-27.59	24.6123	0.56
524	La Najarra	Jasione crispa	46.6755	18.47	228	16.4743	254.021	456.929	-27.8	20.6607	-0.9
525	La Najarra	Jasione crispa	74.7788	11.32	272	14.4879	266.489	456.056	-26.92	23.6636	-1.04
526	La Najarra	Jasione crispa	34.9992	20.6	205	15.3149	291.933	464.214	-27.89	19.4273	-0.46
527	La Najarra	Jasione crispa	9.3685	11.35	242	13.1295	263.287	465.362	-26.64	20.7263	-1.56
528	La Najarra	Jasione crispa	29.6457	14.36	229	16.4418	238.452	471.684	-28.58	24.6886	-0.6
529	La Najarra	Jasione crispa	32.1167	9.39	258	15.7301	237.851	458.848	-27.42	20.0638	-1.12
5210	La Najarra	Jasione crispa	12.7775	7.52	247	16.3122	222.039	458.579	-28.21	20.6424	-0.31
531	La Najarra	Deschampsia flexuosa	296.786	17.92	176	11.7727	343.799	457.687	-26.51	11.7216	-1.05
532	La Najarra	Deschampsia flexuosa	85.9995	21.47	280	6.98495	426.578	454.38	-26.51	13.7246	-0.82
533	La Najarra	Deschampsia flexuosa	65.0222	26.19	301	7.6583	393.963	464.069	-27.7	18.4775	-0.88
534	La Najarra	Deschampsia flexuosa	547.14	16.89	310	6.86861	385.085	456.554	-27.21	9.6992	-2.09
535	La Najarra	Deschampsia flexuosa	129.663	18.76	305	6.62343	385.087	455.875	-27.52	10.1678	-1.73
536	La Najarra	Deschampsia flexuosa	582.357	17.35	270	8.96746	353.136	463.556	-26.63	12.4046	-1.82
537	La Najarra	Deschampsia flexuosa	400.435	17.93	341	7.86408	409.3	465.911	-26.41	13.8736	-1.16
538	La Najarra	Deschampsia flexuosa	560.963	26.36	240	8.63631	383.612	463.11	-26.84	13.4031	-0.79
539	La Najarra	Deschampsia flexuosa	171.908	23.44	384	7.14275	350.372	457.331	-25.05	13.3143	-1.51
5310	La Najarra	Deschampsia flexuosa	45.4564	19.56	223	7.87759	388.026	465.426	-25.45	10.8131	-0.92
541	La Najarra	Senecio carpetanus	27.257	286	477	10.2105	195.026	475.644	-27.78	42.6345	-0.03
542	La Najarra	Senecio carpetanus	41.6533	210	450	9.43024	208.258	482.536	-29.29	43.1499	-1.78
543	La Najarra	Senecio carpetanus	85.2153	301	578	11.4963	210.028	470.531	-27.64	40.8382	-1.72
544	La Najarra	Senecio carpetanus	18.006	216	474	8.71398	225.827	467.411	-29.3	44.6957	-0.33
545	La Najarra	Senecio carpetanus	11.2106	309	435	10.4518	196.092	464.779	-27.86	32.9035	-1.4
546	La Najarra	Senecio carpetanus	39.832	314	516	6.87451	253.174	475.166	-28.36	35.8639	0.38
547	La Najarra	Senecio carpetanus	57.1252	377	404	7.78305	267.09	468.426	-28.45	40.0758	-0.13
548	La Najarra	Senecio carpetanus	33.9207	292	553	7.31828	235.528	473.046	-28.28	33.6256	-0.63
549	La Najarra	Senecio carpetanus	24.1758	349	416	8.9865	255.846	458.752	-29.04	32.3705	0.83
5410	La Najarra	Senecio carpetanus	61.6482	395	414	9.91404	174.859	481.087	-30.16	32.1815	-0.52
551	La Najarra	Jurinea humilis	30.678	3.47	230	14.7247	215.609	475.752	-30.26	24.9716	-4.26
552	La Najarra	Jurinea humilis	23.0515	8.13	220	9.51175	267.226	490.905	-29.2	23.5134	-2.11
553	La Najarra	Jurinea humilis	33.7515	5.75	226	12.0907	277.031	484.411	-29.45	27.7976	-1.97
554	La Najarra	Jurinea humilis	15.33	3.22	274	8.84456	306.504	478.911	-27.66	27.1701	-0.8
555	La Najarra	Jurinea humilis	31.2222	6.55	255	9.71655	285.341	457.344	-28.45	21.6488	-2.91
556	La Najarra	Jurinea humilis	37.9532	4.87	267	11.4596	255.528	484.615	-28.59	30.5761	-1.01
557	La Najarra	Jurinea humilis	82.1488	4.64	195	11.1739	314.525	483.363	-29.16	30.3366	-1.93
558	La Najarra	Jurinea humilis	33.814	3.2	271	9.00224	315.035	469.362	-27.17	29.7751	-0.83
559	La Najarra	Jurinea humilis	33.5027	3.18	210	11.4509	284.098	489.246	-29.78	29.387	0.2
5510	La Najarra	Jurinea humilis	40.0944	5.86	207	10.6548	275.894	476.895	-28.95	25.8879	-0.87
561	La Najarra	Armeria caespitosa	4.37553	17.92	274	13.0434	340.498	487.514	-30.32	15.579	-0.56
562	La Najarra	Armeria caespitosa	5.38007	16.23	181	14.6583	365.872	472.959	-30.67	15.2862	-0.62
563	La Najarra	Armeria caespitosa	9.19407	13.37	271	15.327	368.523	510.911	-27.83	20.8047	0.19
564	La Najarra	Armeria caespitosa	13.5065	15.02	258	13.1515	395.61	493.539	-29.63	15.9688	-0.02
565	La Najarra	Armeria caespitosa	9.14927	16.86	244	15.7983	339.151	490.325	-30.99	16.5116	-0.84
566	La Najarra	Armeria caespitosa	13.388	14.06	273	13.7413	374.242	479.349	-29.2	13.5179	-1.82
567	La Najarra	Armeria caespitosa	11.1931	18.93	249	13.3858	369.89	505.272	-29.88	15.9453	-0.02
568	La Najarra	Armeria caespitosa	5.07337	14.77	242	17.3934	308.682	495.64	-30.88	17.1637	0.72
569	La Najarra	Armeria caespitosa	12.6662	14.48	239	15.688	394.839	484.206	-31.09	14.6038	-1.73
5610	La Najarra	Armeria caespitosa	5.00751	13.62	291	14.1674	361.193	502.247	-30.21	13.1188	-1.38
571	La Najarra	Pilosella vahlii	12.8316	11.23	291	12.4342	244.038	460.755	-27.33	22.3799	-0.96
572	La Najarra	Pilosella vahlii	19.9706	16.21	302	13.2699	226.695	452.124	-27.17	17.0138	-1.62
573	La Najarra	Pilosella vahlii	14.1423	11.75	286	18.6776	202.698	453.104	-27.04	27.4935	-0.8
574	La Najarra	Pilosella vahlii	10.2892	16.08	314	14.1907	239.423	450.769	-26.59	19.3423	-1.07
575	La Najarra	Pilosella vahlii	13.1699	14.61	301	18.3892	214.194	449.827	-27.54	27.399	-0.58
576	La Najarra	Pilosella vahlii	25.5976	30.85	295	17.1881	192.817	445.059	-28.3	28.7814	-0.99
577	La Najarra	Pilosella vahlii	12.1781	9.99	290	12.3448	251.743	418.658	-26.58	20.5985	-0.96
578	La Najarra	Pilosella vahlii	30.0466	16.27	278	14.9783	207.905	449.135	-27.61	23.1737	-0.46
579	La Najarra	Pilosella vahlii	24.7899	12.97	300	14.328	224.026	458.132	-28.19	25.0183	-2.36
5710	La Najarra	Pilosella vahlii	17.4717	13.91	272	13.8504	217.926	459.066	-26.36	20.9046	-1.66
581	La Najarra	Minuartia recurva	9.91958	15.45	77	20.298	353.05	459.627	-28.48	30.6044	1.09
582	La Najarra	Minuartia recurva	8.50216	14.1	97	21.1716	293.97	442.777	-28.93	24.459	0.76
583	La Najarra	Minuartia recurva	11.3425	8.25	95	20.1355	299.912	445.466	-28.87	25.1724	3.8
584	La Najarra	Minuartia recurva	20.5256	11.69	126	17.9606	294.541	445.249	-28.39	27.0525	2.29
585	La Najarra	Minuartia recurva	26.6557	13.04	148	18.1605	290.552	447.28	-28.5	21.9081	1.67
586	La Najarra	Minuartia recurva	10.4924	15.45	148	18.7349	274.445	455.172	-29.59	22.342	1.49
587	La Najarra	Minuartia recurva	35.2429	10.35	128	15.6414	323.34	458.012	-30.05	24.4036	-0.63
588	La Najarra	Minuartia recurva	83.6181	18.81	181	13.1196	297.949	461.026	-28.16	23.9299	-1.26
589	La Najarra	Minuartia recurva	8.04388	10.11	146	17.9371	301.463	446.102	-28.68	23.772	-2.04
5810	La Najarra	Minuartia recurva	23.29	14.65	155	16.6586	296.084	462.794	-27.78	29.4728	0.09
591	La Najarra	Agrostis delicatula	31.1178	15.6	226	10.9112	388.513	446.097	-28.06	15.0794	-0.54
592	La Najarra	Agrostis delicatula	9.47703	8.4	247	10.8528	396.51	448.061	-28.62	13.3561	-2.56
593	La Najarra	Agrostis delicatula	12.5491	11.58	219	9.23212	449.083	452.648	-27.52	9.73676	-2.47
594	La Najarra	Agrostis delicatula	25.2145	11.76	205	13.2008	363.001	449.601	-28.31	12.8156	-2.09
595	La Najarra	Agrostis delicatula	22.1456	13.03	197	12.1381	417.487	451.754	-26.34	13.036	-1.24
596	La Najarra	Agrostis delicatula	36.121	16.8	239	12.2111	372.91	453.521	-27.22	14.111	-1.37
597	La Najarra	Agrostis delicatula	18.7085	10.98	152	15.6002	340.237	446.093	-28.92	15.4203	-0.87
598	La Najarra	Agrostis delicatula	19.5707	14.59	162	11.6459	392.899	451.43	-27.79	9.63212	-1
599	La Najarra	Agrostis delicatula	40.7494	21.54	205	15.532	303.482	449.832	-28.78	15.063	-1.87
5910	La Najarra	Agrostis delicatula	6.81215	7.75	230	12.412	369.499	446.217	-28.21	12.5197	-1.2
5101	La Najarra	Silene ciliata	60.9318	14.87	344	11.4215	253.648	454.749	-28.8	23.7254	1.2
5102	La Najarra	Silene ciliata	20.8187	13.09	211	15.7852	263.055	462.269	-28.61	23.712	0.12
5103	La Najarra	Silene ciliata	27.7639	22.26	352	13.8837	258.277	442.127	-27.75	29.281	0.62
5104	La Najarra	Silene ciliata	54.902	28.49	220	13.0401	255.512	439.388	-27.36	23.8768	-0.45
5105	La Najarra	Silene ciliata	46.9719	21.8	308	19.0141	192.215	449.704	-28.32	32.1015	1.98
5106	La Najarra	Silene ciliata	45.2538	17.8	318	12.363	242.499	439.856	-27.58	23.7165	-0.13
5107	La Najarra	Silene ciliata	43.8065	19.84	442	13.97	168.365	443.868	-27.65	24.1368	1.19
5108	La Najarra	Silene ciliata	20.5091	12.86	351	11.437	243.154	436.469	-27.44	24.6492	0.8
5109	La Najarra	Silene ciliata	52.1812	16.04	250	16.0355	212.676	452.165	-28.91	30.2714	2.11
51010	La Najarra	Silene ciliata	16.7148	11.57	395	13.2016	208.055	450.364	-27.61	26.937	1.87
611	Hermana Mayor	Juniperus communis subsp. alpina	81681.4	250	358	7.76494	399.868	495.874	-27.52	9.12156	-1.81
612	Hermana Mayor	Juniperus communis subsp. alpina	31337.4	120	462	6.05388	425.484	502.431	-25.82	11.0605	-0.02
613	Hermana Mayor	Juniperus communis subsp. alpina	37699.1	260	469	6.76896	397.926	482.502	-24.74	15.0127	-1.53
614	Hermana Mayor	Juniperus communis subsp. alpina	45160.4	160	449	7.73094	352.918	472.722	-23.85	15.5448	-1.54
615	Hermana Mayor	Juniperus communis subsp. alpina	19360.1	120	313	9.26011	380.56	490.11	-28.75	11.7853	-0.74
616	Hermana Mayor	Juniperus communis subsp. alpina	53996.1	150	467	5.28136	470.297	492.02	-25.69	12.2553	-1.89
617	Hermana Mayor	Juniperus communis subsp. alpina	139447	360	503	6.74939	361.973	501.414	-25.44	9.87234	-2.32
618	Hermana Mayor	Juniperus communis subsp. alpina	138466	250	470	5.74803	357.708	519.598	-28.54	11.0626	-1.12
619	Hermana Mayor	Juniperus communis subsp. alpina	34636.1	180	512	4.73855	487.89	502.233	-25.57	10.5349	-0.8
6110	Hermana Mayor	Juniperus communis subsp. alpina	40644.4	240	368	9.24901	329.753	503.367	-26.81	12.9094	-0.36
621	Hermana Mayor	Deschampsia flexuosa	21.7284	25.65	365	6.60754	397.986	453.288	-27.92	8.99337	-0.46
622	Hermana Mayor	Deschampsia flexuosa	79.6441	42.66	313	7.58116	389.66	451.675	-28.59	10.6738	-3.17
623	Hermana Mayor	Deschampsia flexuosa	69.5646	36.99	335	8.17544	328.975	454.17	-27.92	12.4182	-1.34
624	Hermana Mayor	Deschampsia flexuosa	55.2754	35.97	313	7.31158	408.03	454.678	-27.53	8	-2.16
625	Hermana Mayor	Deschampsia flexuosa	272.14	24.16	250	9.56605	358.903	455.35	-28.36	13.4164	-2.15
626	Hermana Mayor	Deschampsia flexuosa	185.422	16.51	285	8.99027	385.94	460.374	-28.15	12.9885	-3.93
627	Hermana Mayor	Deschampsia flexuosa	95.0948	20.64	350	6.68939	412.31	462.57	-27.38	21.8211	-4.12
628	Hermana Mayor	Deschampsia flexuosa	43.3272	47.78	291	7.54567	397.592	446.136	-27.46	11.647	-1.66
629	Hermana Mayor	Deschampsia flexuosa	81.2357	32.23	334	5.93606	412.538	453.531	-26.66	10.3003	-1.36
6210	Hermana Mayor	Deschampsia flexuosa	47.0511	47.86	388	6.95621	367.729	450.418	-26.93	7.334	-1.69
631	Hermana Mayor	Jurinea humilis	33.3739	2.71	264	10.5323	212.253	464.839	-29.45	27.0744	0.19
632	Hermana Mayor	Jurinea humilis	17.3818	6.55	266	10.2644	224.723	455.602	-30.27	24.8364	-0.98
633	Hermana Mayor	Jurinea humilis	41.1192	5.64	241	10.1592	247.543	470.228	-30.9	20.6308	-1.82
634	Hermana Mayor	Jurinea humilis	27.171	5.45	295	7.10866	314.241	472.668	-29.83	23.6097	-1.23
635	Hermana Mayor	Jurinea humilis	41.1371	4.4	307	11.0388	237.597	478.114	-29.92	24.1797	-3.21
636	Hermana Mayor	Jurinea humilis	25.5905	4.51	289	9.87261	284.358	485.686	-29.42	24.6103	-2.38
637	Hermana Mayor	Jurinea humilis	22.7921	4.43	282	8.72399	270.626	476.821	-28.83	21.575	-2.65
638	Hermana Mayor	Jurinea humilis	16.8906	5.96	314	8.74229	271.352	479.984	-30	26.7432	-0.73
639	Hermana Mayor	Jurinea humilis	15.5354	4.64	380	8.62889	259.131	483.182	-30.02	30.0741	-1.48
6310	Hermana Mayor	Jurinea humilis	28.8368	6.18	340	9.34568	257.947	473.207	-29.85	25.8998	0.49
641	Hermana Mayor	Festuca curvifolia	230.129	40.88	796	3.26667	525.456	460.372	-26.3	8.38524	-3.32
642	Hermana Mayor	Festuca curvifolia	141.197	41.32	831	3.24578	502.027	501.22	-25.46	14.2557	5.74
643	Hermana Mayor	Festuca curvifolia	69.4956	39.49	872	2.97701	493.276	488.143	-25.25	11.813	-1.99
644	Hermana Mayor	Festuca curvifolia	46.1979	33.04	769	3.28354	515.807	488.948	-24.88	10.093	-2.31
645	Hermana Mayor	Festuca curvifolia	194.834	49.91	746	3.60923	487.638	496.429	-26.11	11.1256	-0.93
646	Hermana Mayor	Festuca curvifolia	407.15	46.5	656	3.42452	541.858	494.654	-26.1	9.74619	-3.73
647	Hermana Mayor	Festuca curvifolia	140.154	49.56	750	3.57176	500.835	494.687	-26.03	9.58623	-3.09
648	Hermana Mayor	Festuca curvifolia	544.556	45.8	901	3.33843	467.676	494.222	-25.92	7.19048	-2.26
649	Hermana Mayor	Festuca curvifolia	75.3439	32.33	583	4.35293	462.245	492.872	-26.91	13.85	-2.37
6410	Hermana Mayor	Festuca curvifolia	222.857	39.1	803	3.50766	453.092	493.879	-25.93	10.0449	-2.12
651	Hermana Mayor	Senecio carpetanus	28.4883	365	450	10.9799	187.47	446.385	-29.91	30.8874	-3.36
652	Hermana Mayor	Senecio carpetanus	8.81576	412	372	10.0112	208.547	441.504	-29.14	27.4091	-3.65
653	Hermana Mayor	Senecio carpetanus	45.3035	304	452	8.48837	236.122	455.086	-28.41	34.4024	2.82
654	Hermana Mayor	Senecio carpetanus	26.8072	276	513	10.4802	183.043	444.306	-28.83	36.4299	5.22
655	Hermana Mayor	Senecio carpetanus	52.9747	464	466	8.86359	194.177	448.326	-29.48	34.9746	-1.6
656	Hermana Mayor	Senecio carpetanus	26.6923	509	353	11.0536	195.801	458.66	-29.77	34.1189	-3.17
657	Hermana Mayor	Senecio carpetanus	12.8369	347	408	10.1417	197.122	447.709	-29.94	30.6028	-2.5
658	Hermana Mayor	Senecio carpetanus	37.4472	367	338	10.2413	236.069	458.175	-28.33	27.428	-3.17
659	Hermana Mayor	Senecio carpetanus	10.898	332	435	10.2473	196.113	446.051	-29.92	37.1867	1.94
6510	Hermana Mayor	Senecio carpetanus	18.9209	419	515	10.6799	181.097	442.237	-29.72	31.6976	4.28
661	Hermana Mayor	Pilosella vahlii	17.6283	19.26	338	18.2983	207.868	440.695	-27.6	19.4859	-2.22
662	Hermana Mayor	Pilosella vahlii	26.5588	23.18	352	18.228	185.308	469.932	-28.32	23.4897	-3.1
663	Hermana Mayor	Pilosella vahlii	20.9195	28.3	333	17.4614	208.53	450.325	-28.72	17.5852	-3.33
664	Hermana Mayor	Pilosella vahlii	23.5956	13.56	444	17.805	163.2	460.535	-27.78	26.6221	-2.4
665	Hermana Mayor	Pilosella vahlii	16.3133	17.9	291	17.8544	191.703	450.249	-26.44	18.3248	-2.83
666	Hermana Mayor	Pilosella vahlii	42.7357	55.35	243	22.9992	161.862	447.678	-28.2	20.7646	-2.63
667	Hermana Mayor	Pilosella vahlii	24.232	36.5	237	28.7309	143.445	441.699	-28.65	23.7028	-3.43
668	Hermana Mayor	Pilosella vahlii	25.872	32.92	256	17.5431	217.592	458.483	-28.68	17.6589	-4.38
669	Hermana Mayor	Pilosella vahlii	20.3707	15.96	262	16.4043	223.578	470.911	-28.55	20.2077	-3.12
6610	Hermana Mayor	Pilosella vahlii	15.4001	18.54	311	17.9441	188.972	472.24	-28.47	21.0871	-3.88
671	Hermana Mayor	Jasione crispa	40.8241	16.29	143	23.3248	206.877	447.197	-29.56	20.5841	1.36
672	Hermana Mayor	Jasione crispa	17.1399	13.5	169	16.2891	260.896	454.898	-27.52	21.8223	2.66
673	Hermana Mayor	Jasione crispa	52.2127	17.31	130	23.7019	208.046	458.095	-29.71	21.6393	1
674	Hermana Mayor	Jasione crispa	39.2146	14.09	143	26.2985	181.182	453.772	-30.23	19.821	-0.92
675	Hermana Mayor	Jasione crispa	23.7822	16.47	130	16.9851	266.476	466.317	-27.66	25.5808	-1.77
676	Hermana Mayor	Jasione crispa	8.71582	12.55	176	17.0584	237.972	459.302	-28.87	22.0817	-0.52
677	Hermana Mayor	Jasione crispa	23.015	22.93	173	23.6213	174.646	447.433	-27.58	23.0464	0.84
678	Hermana Mayor	Jasione crispa	32.6171	11.11	182	19.0892	249.775	457.633	-29.32	19.3402	-1.36
679	Hermana Mayor	Jasione crispa	13.1407	9.47	174	17.779	280.431	460.801	-29.18	25.79	-0.75
6710	Hermana Mayor	Jasione crispa	31.964	13.58	104	24.1393	215.706	458.697	-28.85	23.6125	-0.16
681	Hermana Mayor	Armeria caespitosa	25.3629	28.63	227	13.6842	404.081	514.284	-28.11	14.2933	-0.07
682	Hermana Mayor	Armeria caespitosa	8.34869	17.6	272	13.1137	362.463	502.718	-29.48	11.2043	0.02
683	Hermana Mayor	Armeria caespitosa	7.9523	18.56	317	13.6001	381.55	504.296	-28.82	15.353	-0.24
684	Hermana Mayor	Armeria caespitosa	25.3095	25.74	209	16.0354	362.705	508.866	-29.13	18.5932	0.04
685	Hermana Mayor	Armeria caespitosa	10.3702	22.32	224	16.185	359.797	508.17	-28.99	13.8565	-0.69
686	Hermana Mayor	Armeria caespitosa	10.8142	21.08	246	14.3647	310.301	503.803	-29.02	17.3158	0.66
687	Hermana Mayor	Armeria caespitosa	25.5619	19.3	234	13.603	380.305	519.625	-29.08	15.1891	1.16
688	Hermana Mayor	Armeria caespitosa	12.0089	18.21	192	15.136	337.32	499.296	-29.39	13.0092	0.22
689	Hermana Mayor	Armeria caespitosa	20.5404	26.01	195	14.2169	364.277	510.74	-27.71	17.9779	0.63
6810	Hermana Mayor	Armeria caespitosa	16.6692	21.92	272	13.5293	336.152	502.057	-28.74	15.1386	0.67
691	Hermana Mayor	Silene ciliata	16.8785	10.79	264	15.5982	223.584	439.959	-26.75	22.4251	0.77
692	Hermana Mayor	Silene ciliata	16.8623	12.49	341	18.6617	158.02	433.997	-28.45	27.0168	0.87
693	Hermana Mayor	Silene ciliata	22.7759	13.48	398	16.9768	167.729	445.83	-26.43	42.4011	-0.02
694	Hermana Mayor	Silene ciliata	36.8968	12.07	346	16.9857	189.787	435.672	-27.8	21.0518	2.57
695	Hermana Mayor	Silene ciliata	24.4512	13.52	403	16.0917	183.598	434.615	-27.24	29.7082	0.18
696	Hermana Mayor	Silene ciliata	13.4591	12.03	529	12.8264	172.906	408.131	-28.54	24.9336	1.61
697	Hermana Mayor	Silene ciliata	42.9708	15.39	387	12.3355	191.986	420.155	-27.2	26.4166	1.36
698	Hermana Mayor	Silene ciliata	37.7523	15.11	172	13.1652	200.39	426.858	-28.12	19.8539	1.95
699	Hermana Mayor	Silene ciliata	21.6019	12.44	380	15.5623	204.912	432.381	-27.95	23.7438	2.74
6910	Hermana Mayor	Silene ciliata	18.1475	23.09	395	12.5357	207.149	431.299	-27.24	21.4234	1.96
6101	Hermana Mayor	Agrostis delicatula	9.40122	15.27	165	7.71653	420.069	446.264	-28.68	12.3524	-2.12
6102	Hermana Mayor	Agrostis delicatula	13.5109	26.57	301	7.67477	457.654	448.455	-28.47	11.2555	-2.03
6103	Hermana Mayor	Agrostis delicatula	14.7786	16.16	229	10.4049	428.769	446.779	-27.97	12.5661	0.24
6104	Hermana Mayor	Agrostis delicatula	20.5089	17.9	229	10.1617	412.056	452.989	-27.9	13.5689	-2.34
6105	Hermana Mayor	Agrostis delicatula	16.3238	21.53	195	10.5139	418.408	458.156	-27.94	18.4367	0.86
6106	Hermana Mayor	Agrostis delicatula	21.3657	24.45	217	8.57396	476.613	444.636	-28.52	13.032	-1.7
6107	Hermana Mayor	Agrostis delicatula	9.39698	17.89	187	11.1126	432.006	448.201	-27.87	16.5283	-2.37
6108	Hermana Mayor	Agrostis delicatula	17.2053	18.62	195	10.3979	400.037	450.054	-27.23	17.1465	-0.55
6109	Hermana Mayor	Agrostis delicatula	22.3469	23.46	219	7.90055	453.867	457.131	-28.07	16.9148	-1.24
61010	Hermana Mayor	Agrostis delicatula	23.7516	15.37	226	10.5324	402.516	450.414	-28.02	16.3078	0.89
711	Peñalara	Armeria caespitosa	2.61881	14.13	210	12.7753	305.554	498.193	-30.13	15.7442	-1.4
712	Peñalara	Armeria caespitosa	1.90203	23.22	261	13.3028	290.848	514.465	-30.51	14.3374	-2.24
713	Peñalara	Armeria caespitosa	3.27784	13.31	165	16.5318	284.88	510.858	-29.6	12.0678	-3.17
714	Peñalara	Armeria caespitosa	4.60288	14.32	215	19.1886	274.166	504.771	-29.94	13.7249	-1.87
715	Peñalara	Armeria caespitosa	10.3037	19.21	224	15.7406	321.559	515.566	-31.6	16.6623	-0.17
716	Peñalara	Armeria caespitosa	6.5907	13.95	182	17.638	301.365	513.906	-28.98	18.2498	0.99
717	Peñalara	Armeria caespitosa	3.20278	15.28	198	10.4892	384.116	514.719	-28.28	9.9277	-3.38
718	Peñalara	Armeria caespitosa	8.38344	22.64	241	23.6737	231.66	500.398	-29.69	19.3411	-0.29
719	Peñalara	Armeria caespitosa	1.67541	13.1	162	17.8299	319.381	500.412	-29.52	19.0192	-0.83
7110	Peñalara	Armeria caespitosa	4.47575	14.12	143	14.6765	316.979	512.824	-29.15	10.469	-2.58
721	Peñalara	Jasione crispa	10.5073	20.04	137	25.5654	212.731	459.796	-29.96	17.011	-1.94
722	Peñalara	Jasione crispa	12.8172	11.9	173	20.5044	241.569	464.813	-29.95	17.69	-1
723	Peñalara	Jasione crispa	12.0069	12.29	140	18.7051	265.028	451.58	-28.87	18.4529	-0.72
724	Peñalara	Jasione crispa	18.6725	18.23	220	19.0153	224.184	461.497	-29.43	20.6926	-0.48
725	Peñalara	Jasione crispa	7.43973	16.45	162	17.6218	265.562	460.972	-28.77	17.0314	-0.97
726	Peñalara	Jasione crispa	10.5153	13.99	147	21.1624	208.879	467.531	-29.47	19.7007	-0.98
727	Peñalara	Jasione crispa	9.99627	17.43	156	20.9915	235.789	471.634	-27.44	22.9864	0.23
728	Peñalara	Jasione crispa	11.3014	11.44	199	17.7438	259.108	463.375	-27.33	18.8161	-0.05
729	Peñalara	Jasione crispa	10.9957	13.98	205	14.9772	271.287	474.705	-28.47	19.3778	-0.11
7210	Peñalara	Jasione crispa	25.0898	18.08	161	21.0977	217.148	468.453	-28.16	22.2531	-0.33
731	Peñalara	Pilosella vahlii	5.67008	27.08	272	17.749	197.917	439.134	-27.31	20.4957	-3.44
732	Peñalara	Pilosella vahlii	6.98522	15.77	286	17.1795	185.397	437.114	-28.41	17.4872	-3.45
733	Peñalara	Pilosella vahlii	5.05509	13.5	311	18.652	172.78	445.012	-27.31	19.6599	-3.8
734	Peñalara	Pilosella vahlii	10.6348	20.75	352	19.0507	147.505	459.907	-27.2	24.2682	-3.24
735	Peñalara	Pilosella vahlii	18.0144	36.36	355	19.698	167.999	449.858	-28.69	20.9736	-3.57
736	Peñalara	Pilosella vahlii	27.6428	38.91	258	21.9829	166.941	446.814	-28.14	21.7135	-4.42
737	Peñalara	Pilosella vahlii	22.7599	22.74	349	16.6183	175.287	457.887	-26.94	23.4937	-3.74
738	Peñalara	Pilosella vahlii	14.9711	31	236	20.1	180.443	444.811	-28.03	20.226	-4.38
739	Peñalara	Pilosella vahlii	15.0014	33.9	272	19.4106	174.84	446.116	-28.3	20.0538	-4.97
7310	Peñalara	Pilosella vahlii	10.4565	31.32	227	20.7419	168.872	448.549	-27.61	20.5204	-3.36
741	Peñalara	Senecio carpetanus	48.7523	376	578	10.622	162.91	440.875	-28.1	35.2118	-1.89
742	Peñalara	Senecio carpetanus	24.9059	386	587	9.94505	225.585	471.191	-29.43	37.1337	-0.84
743	Peñalara	Senecio carpetanus	13.3505	321	588	12.316	136.034	450.193	-29.72	33.9979	-3.35
744	Peñalara	Senecio carpetanus	12.9348	401	528	8.97784	185.298	448.977	-28.84	38.0044	-0.1
745	Peñalara	Senecio carpetanus	20.7834	327	560	9.10225	190.004	450.12	-29.89	32.7064	1.75
746	Peñalara	Senecio carpetanus	10.1841	304	501	10.4294	192.509	447.382	-30.54	31.7087	2.44
747	Peñalara	Senecio carpetanus	22.5768	372	613	10.1233	168.277	449.741	-28.84	33.0986	0.27
748	Peñalara	Senecio carpetanus	20.5687	301	523	9.68819	192.664	462.224	-29.87	37.1015	0.57
749	Peñalara	Senecio carpetanus	17.9823	224	495	11.1292	166.47	449.906	-29.34	30.8318	2.04
7410	Peñalara	Senecio carpetanus	15.4494	239	501	10.2057	172.254	443.664	-29.29	23.3058	2.37
751	Peñalara	Festuca curvifolia	36.3591	29.78	520	4.03269	470.684	485.86	-26.89	14.841	-0.94
752	Peñalara	Festuca curvifolia	22.4209	28.5	495	3.94371	524.428	485.53	-24.87	12.1056	-2.9
753	Peñalara	Festuca curvifolia	57.898	28.38	469	4.71387	457.989	487.236	-25.06	17.7981	-2.6
754	Peñalara	Festuca curvifolia	25.5419	31.56	538	4.50803	412.54	490.955	-24.92	17.0647	-2.44
755	Peñalara	Festuca curvifolia	55.7407	46.88	520	4.48821	503.645	490.491	-25.11	14.4832	-3.53
756	Peñalara	Festuca curvifolia	22.3967	19.25	682	3.71021	509.607	481.808	-25.45	13.6883	-3.35
757	Peñalara	Festuca curvifolia	169.081	41.64	596	3.77097	481.168	484.711	-26.55	16.1108	-2.99
758	Peñalara	Festuca curvifolia	27.1261	53.85	474	4.63649	467.945	483.289	-25.31	16.9734	-2.07
759	Peñalara	Festuca curvifolia	25.4513	29.39	436	4.34699	468.608	485.676	-27.04	11.7638	-1.8
7510	Peñalara	Festuca curvifolia	127.904	32.71	515	3.69279	465.001	482.82	-26.25	14.5775	-1.65
761	Peñalara	Silene ciliata	25.6771	20.2	271	14.8178	214.435	447.191	-27.8	20.8021	-0.64
762	Peñalara	Silene ciliata	34.8025	24.98	364	12.6775	202.838	459.867	-27.47	23.0807	1.35
763	Peñalara	Silene ciliata	24.1452	24.35	463	14.7946	197.531	449.605	-28.31	18.0453	-1.27
764	Peñalara	Silene ciliata	19.0967	24.43	449	12.4219	210.762	431.768	-28.02	23.8128	1.38
765	Peñalara	Silene ciliata	16.2265	18.3	395	13.7112	209.683	468.268	-28.09	24.978	1.49
766	Peñalara	Silene ciliata	26.2671	17.96	357	14.3494	217.517	422.997	-28.72	19.8981	-0.75
767	Peñalara	Silene ciliata	23.8795	21.48	337	14.7617	200.583	445.106	-28.82	19.4624	1.86
768	Peñalara	Silene ciliata	22.5689	28.38	339	13.6902	208.649	445.111	-27.6	18.8188	0.35
769	Peñalara	Silene ciliata	12.5294	15.7	406	14.5877	194.709	446.843	-26.76	19.7358	-0.61
7610	Peñalara	Silene ciliata	13.9566	15.87	389	14.369	217.664	440.597	-27.96	23.3424	0
771	Peñalara	Juniperus communis subsp. alpina	47105	260	380	6.29586	459.856	516.724	-23.3	17.3	-2.72
772	Peñalara	Juniperus communis subsp. alpina	38802.6	186	472	6.63172	395.432	486.94	-25.16	10.4003	-2.74
773	Peñalara	Juniperus communis subsp. alpina	38000.7	280	430	6.58685	400.483	489.438	-25.27	13.9801	-1.55
774	Peñalara	Juniperus communis subsp. alpina	47528.4	153	410	6.66388	439.057	499.877	-25.5	12.6837	-4
775	Peñalara	Juniperus communis subsp. alpina	36013.6	136	422	6.9138	446.96	494.031	-25.2	12.5271	-2.09
776	Peñalara	Juniperus communis subsp. alpina	17176.7	86	488	6.35786	400.512	484.481	-25.13	13.3944	-2.41
777	Peñalara	Juniperus communis subsp. alpina	53584.6	150	417	7.12573	393.532	485.005	-26.09	12.1098	-2.81
778	Peñalara	Juniperus communis subsp. alpina	34287.3	186	385	6.83179	447.094	495.311	-24.7	12.583	-2.2
779	Peñalara	Juniperus communis subsp. alpina	40766.9	143	402	6.65247	451.386	488.718	-25.53	11.211	-2.38
7710	Peñalara	Juniperus communis subsp. alpina	73268.2	153	521	6.31434	482.825	495.414	-25.34	12.7523	-1.59
781	Peñalara	Agrostis delicatula	14.339	26.95	171	13.3462	385.717	476.708	-29.35	15.6791	-0.34
782	Peñalara	Agrostis delicatula	9.93526	21.11	197	11.2817	428.872	449.08	-29.38	12.3524	-2.76
783	Peñalara	Agrostis delicatula	10.5798	22.47	224	11.2555	412.986	444.998	-28.94	12.7362	-1.41
784	Peñalara	Agrostis delicatula	6.47008	15.68	198	15.4194	362.506	443.608	-28.61	14.1249	-2.15
785	Peñalara	Agrostis delicatula	15.0312	19.81	211	13.4951	375.41	451.602	-29.92	13.3619	-2.04
786	Peñalara	Agrostis delicatula	6.10613	19.31	181	14.2001	397.444	446.824	-30.35	10.3788	-1.85
787	Peñalara	Agrostis delicatula	9.24608	23.83	178	13.5182	377.818	443.213	-28.9	13.7707	-1.19
788	Peñalara	Agrostis delicatula	6.6891	15.82	217	12.2463	388.432	446.672	-28.5	16.9858	-1.47
789	Peñalara	Agrostis delicatula	14.9088	24.42	187	14.3321	358.194	453.432	-28.87	19.3853	-0.73
7810	Peñalara	Agrostis delicatula	15.1638	21.51	195	14.0179	398.471	456.012	-28.27	18.4108	-0.4
791	Peñalara	Deschampsia flexuosa	100.136	25.5	331	8.98563	342.488	490.182	-28.39	16.0615	0.93
792	Peñalara	Deschampsia flexuosa	56.7207	27.12	447	5.62349	419.593	463.375	-28.17	9.24133	-3.1
793	Peñalara	Deschampsia flexuosa	90.4077	43.11	363	7.72309	411.912	465.517	-27.02	15.2974	-0.73
794	Peñalara	Deschampsia flexuosa	27.1028	29.35	411	8.69685	389.885	478.235	-27.31	14.448	-2.84
795	Peñalara	Deschampsia flexuosa	127.458	32.93	381	7.16407	448.413	467.812	-27.08	15.212	-2.61
796	Peñalara	Deschampsia flexuosa	60.9382	39.47	359	5.72979	450.939	465.276	-26.67	11.7794	0.77
797	Peñalara	Deschampsia flexuosa	31.1601	25.3	311	5.98132	402.736	458.529	-27.02	11.5441	-1.65
798	Peñalara	Deschampsia flexuosa	43.01	34.83	303	8.04741	406.111	462.537	-26.49	15.7107	-2.42
799	Peñalara	Deschampsia flexuosa	56.3158	33.95	414	8.47124	335.282	480.298	-26.67	30.6089	-4.87
7910	Peñalara	Deschampsia flexuosa	35.8696	21.37	444	6.73622	425.43	464.719	-28.15	14.625	-3.15
7101	Peñalara	Jurinea humilis	30.4896	9.08	210	9.51723	295.408	548.631	-29.64	24.3348	1.65
7102	Peñalara	Jurinea humilis	26.1386	8.61	242	9.51421	267.672	474.809	-30.16	22.376	0.71
7103	Peñalara	Jurinea humilis	33.8166	4.94	291	8.03946	318.95	469.461	-29.67	26.4213	0.59
7104	Peñalara	Jurinea humilis	35.9214	11.31	295	8.47213	286.864	475.498	-29.74	23.9205	-0.58
7105	Peñalara	Jurinea humilis	40.6324	12.41	266	9.49832	294.382	475.125	-30.71	26.7129	-0.33
7106	Peñalara	Jurinea humilis	31.1159	8.3	223	11.9908	247.542	470.314	-30.6	24.7566	0.08
7107	Peñalara	Jurinea humilis	24.4726	10.28	302	10.1981	240.794	487.29	-29.47	23.3193	0.65
7108	Peñalara	Jurinea humilis	6.88826	13.84	402	9.1572	245.206	475.693	-28.24	26.4974	0.64
7109	Peñalara	Jurinea humilis	24.6271	9.16	241	9.6232	255.577	478.125	-30.31	28.2255	0.73
71010	Peñalara	Jurinea humilis	26.6685	9.03	313	10.765	259.805	456.913	-30.1	21.2166	-2.15
7111	Peñalara	Minuartia recurva	27.2101	24.87	73	17.5267	412.647	449.401	-28.61	11.2727	-4.56
7112	Peñalara	Minuartia recurva	19.6091	22.29	113	15.4021	378.486	451.979	-29.47	15.039	-3.33
7113	Peñalara	Minuartia recurva	11.9671	9.25	113	14.1438	384.81	453.239	-28.54	13.5197	-2.3
7114	Peñalara	Minuartia recurva	16.1413	11.45	78	17.5699	394.983	451.835	-28.93	18.2318	-2.38
7115	Peñalara	Minuartia recurva	11.9861	8.94	95	16.3077	379.762	453.111	-28.6	12.6122	-3.82
7116	Peñalara	Minuartia recurva	34.14	26.35	76	17.039	387.725	464.748	-30.02	13.1374	-4.51
811	Cabeza de Hierro Mayor	Juniperus communis subsp. alpina	100138	173	385	8.04008	372.342	491.538	-24.8	12.7899	-5.09
812	Cabeza de Hierro Mayor	Juniperus communis subsp. alpina	161525	186	273	7.86506	373.43	493.182	-25.8	13.2223	-5.58
813	Cabeza de Hierro Mayor	Juniperus communis subsp. alpina	113911	160	344	7.83455	408.729	488.83	-25.64	12.5071	-4.59
814	Cabeza de Hierro Mayor	Juniperus communis subsp. alpina	47245.6	240	331	7.50488	402.094	506.083	-26.37	13.8718	-4.56
815	Cabeza de Hierro Mayor	Juniperus communis subsp. alpina	61496.7	166	402	7.2659	405.395	493.022	-25.81	12.4042	-4.75
816	Cabeza de Hierro Mayor	Juniperus communis subsp. alpina	82466.8	193	332	8.17046	391.199	493.963	-25.9	12.4358	-4.11
817	Cabeza de Hierro Mayor	Juniperus communis subsp. alpina	5222.9	46	470	6.5513	422.032	496.266	-25.47	13.2033	-3.37
818	Cabeza de Hierro Mayor	Juniperus communis subsp. alpina	59219	193	358	8.3245	398.21	488.121	-25.68	12.027	-3.99
819	Cabeza de Hierro Mayor	Juniperus communis subsp. alpina	9177.38	93	396	7.50553	440.492	503.953	-27.64	6.99967	-4.11
8110	Cabeza de Hierro Mayor	Juniperus communis subsp. alpina	31652.3	173	320	7.72829	402.458	484.655	-25.32	12.9236	-3.8
821	Cabeza de Hierro Mayor	Armeria caespitosa	6.5742	19.33	233	16.6389	335.192	488.56	-28.81	10.5999	-4.97
822	Cabeza de Hierro Mayor	Armeria caespitosa	8.7382	16.55	243	11.8804	403.97	496.2	-27.87	12.1231	-3.95
823	Cabeza de Hierro Mayor	Armeria caespitosa	7.61224	12.82	220	16.0147	332.354	498.94	-28.37	11.6452	-4.14
824	Cabeza de Hierro Mayor	Armeria caespitosa	8.04826	13.46	271	13.334	370.444	507.629	-29.36	11.9525	-4.03
825	Cabeza de Hierro Mayor	Armeria caespitosa	10.34	16.78	237	15.5639	385.901	517.757	-27.05	14.9636	-3.13
826	Cabeza de Hierro Mayor	Armeria caespitosa	9.81126	16.56	227	15.6581	378.763	500.064	-29.34	14.9952	-1.19
827	Cabeza de Hierro Mayor	Armeria caespitosa	6.15881	17.9	234	16.1766	350.889	510.381	-29.84	16.5449	-1.4
828	Cabeza de Hierro Mayor	Armeria caespitosa	15.0711	17.78	214	14.6755	377.003	514.374	-28.22	15.1388	-2.02
829	Cabeza de Hierro Mayor	Armeria caespitosa	12.4585	16.88	275	17.2556	372.639	508.604	-29.03	12.9589	-2.23
8210	Cabeza de Hierro Mayor	Armeria caespitosa	11.0752	14.34	244	17.3154	337.924	522.091	-28.19	14.5326	-1.25
831	Cabeza de Hierro Mayor	Pilosella vahlii	6.22877	24.29	276	19.5453	174.56	461.699	-28.34	13.4505	-5.68
832	Cabeza de Hierro Mayor	Pilosella vahlii	6.88583	14.77	312	17.2755	171.143	461.777	-27.83	16.9275	-3.27
833	Cabeza de Hierro Mayor	Pilosella vahlii	6.71359	16.19	359	14.0773	201.63	448.493	-27.16	20.6682	-4.89
834	Cabeza de Hierro Mayor	Pilosella vahlii	5.51475	10.4	284	16.2151	203.469	453.85	-26.73	19.9967	-4.39
835	Cabeza de Hierro Mayor	Pilosella vahlii	6.92495	22.1	292	15.5466	196.873	455.647	-27.12	18.3975	-2.98
836	Cabeza de Hierro Mayor	Pilosella vahlii	4.85073	13.53	252	15.4084	226.291	456.543	-26.28	19.0377	-5.01
837	Cabeza de Hierro Mayor	Pilosella vahlii	5.91324	17.54	421	14.9732	184.049	446.719	-26.12	17.5608	-4.12
838	Cabeza de Hierro Mayor	Pilosella vahlii	3.96174	10.59	334	16.1157	185.079	458.149	-28.21	23.259	-4.54
839	Cabeza de Hierro Mayor	Pilosella vahlii	6.54545	18.69	333	13.8627	232.793	454.728	-26.75	19.5764	-4.46
8310	Cabeza de Hierro Mayor	Pilosella vahlii	4.62981	18.96	240	17.0144	218.513	446.855	-27.63	20.3684	-4.83
841	Cabeza de Hierro Mayor	Jasione crispa	16.0014	14.9	198	15.0551	281.426	467.285	-27.65	16.4845	-3.19
842	Cabeza de Hierro Mayor	Jasione crispa	14.0043	12.99	179	15.2518	286.22	461.402	-28.64	16.1329	-2.14
843	Cabeza de Hierro Mayor	Jasione crispa	11.9491	21.62	165	16.0998	267.095	472.333	-29.6	16.2577	-3.02
844	Cabeza de Hierro Mayor	Jasione crispa	23.5101	21.31	200	14.9998	269.839	473.056	-28.08	17.5963	-2.4
845	Cabeza de Hierro Mayor	Jasione crispa	9.5072	14.23	249	13.7573	259.002	454.918	-28.13	13.2762	-3.05
846	Cabeza de Hierro Mayor	Jasione crispa	5.51095	12.35	203	14.1959	287.989	474.946	-28.15	16.1444	-0.92
847	Cabeza de Hierro Mayor	Jasione crispa	12.3861	22.57	172	14.5315	271.826	342.211	-29.13	14.3576	-1.45
848	Cabeza de Hierro Mayor	Jasione crispa	16.1602	13.25	190	15.8067	272.602	469.372	-28.15	16.5789	-3.07
849	Cabeza de Hierro Mayor	Jasione crispa	15.6919	22.91	231	14.6433	263.365	469.287	-29.55	16.1319	-2.82
8410	Cabeza de Hierro Mayor	Jasione crispa	42.0398	17.51	229	15.2594	270.613	453.868	-28.56	15.8845	-2.45
851	Cabeza de Hierro Mayor	Festuca curvifolia	28.6621	28.66	466	4.59119	446.001	452.784	-25.01	13.5303	-3.05
852	Cabeza de Hierro Mayor	Festuca curvifolia	27.6047	22.12	637	4.26526	462.494	492.154	-26.07	11.9069	2.06
853	Cabeza de Hierro Mayor	Festuca curvifolia	14.7496	25.09	549	4.43883	439.894	491.906	-26.17	10.2338	-1.73
854	Cabeza de Hierro Mayor	Festuca curvifolia	92.0605	24.6	549	4.61483	493.083	485.467	-25.95	18.1919	-2.73
855	Cabeza de Hierro Mayor	Festuca curvifolia	277.308	33.55	579	3.66071	541.905	496	-25.66	16.5242	-2.76
856	Cabeza de Hierro Mayor	Festuca curvifolia	67.0543	24.66	587	3.56282	455.949	489.006	-25.85	16.4509	-2.82
857	Cabeza de Hierro Mayor	Festuca curvifolia	46.424	30.73	563	3.90879	468.389	490.04	-25.66	18.2711	-3.4
858	Cabeza de Hierro Mayor	Festuca curvifolia	219.889	32.44	617	4.40053	468.106	489.04	-24.93	17.4236	-2.93
859	Cabeza de Hierro Mayor	Festuca curvifolia	13.7932	20.94	630	3.86566	445.5	496.252	-24.28	17.7857	-3.25
8510	Cabeza de Hierro Mayor	Festuca curvifolia	79.4051	38.21	520	4.26464	502.656	491.644	-24.68	18.695	-2.08
861	Cabeza de Hierro Mayor	Deschampsia flexuosa	51.8392	32.44	292	8.50188	397.382	450.836	-26.9	8.15268	-1.76
862	Cabeza de Hierro Mayor	Deschampsia flexuosa	41.7094	43.97	235	8.18832	397.409	464.597	-27.66	10.5679	-0.69
863	Cabeza de Hierro Mayor	Deschampsia flexuosa	33.9079	18.44	274	7.82695	374.075	466.871	-27.56	14.1597	-3.94
864	Cabeza de Hierro Mayor	Deschampsia flexuosa	265.967	64.16	386	6.32872	420.633	460.041	-26.99	10.3188	-2.96
865	Cabeza de Hierro Mayor	Deschampsia flexuosa	166.629	30.75	366	6.66585	376.72	462.046	-27.54	12.3524	-2.31
866	Cabeza de Hierro Mayor	Deschampsia flexuosa	25.2164	34.87	366	7.91742	365.958	459.872	-27.72	11.0523	-1.74
867	Cabeza de Hierro Mayor	Deschampsia flexuosa	53.5435	34.67	227	5.46887	454.158	454.955	-28.5	9.76388	-3.57
868	Cabeza de Hierro Mayor	Deschampsia flexuosa	19.6197	31.49	253	8.28448	402.993	457.226	-27.99	7.28662	-4.53
869	Cabeza de Hierro Mayor	Deschampsia flexuosa	42.5679	15.55	337	7.49467	380.881	464.175	-27.62	14.642	-2.26
8610	Cabeza de Hierro Mayor	Deschampsia flexuosa	46.9521	13.43	275	7.96919	389.104	465.985	-30.35	12.9082	-2.58
871	Cabeza de Hierro Mayor	Jurinea humilis	21.4685	4.44	247	10.0499	261.793	485.88	-28.92	24.6567	-3.93
872	Cabeza de Hierro Mayor	Jurinea humilis	29.6034	7.35	285	10.257	157.857	475.892	-29.63	25.5469	-3.77
873	Cabeza de Hierro Mayor	Jurinea humilis	18.8888	5.14	316	9.74074	276.88	489.599	-29.58	21.6327	-2.12
874	Cabeza de Hierro Mayor	Jurinea humilis	19.5316	7.57	268	12.2793	234.087	480.207	-30.22	22.4443	-3.61
875	Cabeza de Hierro Mayor	Jurinea humilis	14.8987	7.66	270	12.3923	213.41	479.676	-29.53	26.1428	-1.96
876	Cabeza de Hierro Mayor	Jurinea humilis	26.9473	6.22	264	9.83578	284.402	480.035	-28.81	23.9689	-3.6
877	Cabeza de Hierro Mayor	Jurinea humilis	17.5012	6.13	259	9.55823	301.91	473.416	-29.06	20.7772	-4.31
878	Cabeza de Hierro Mayor	Jurinea humilis	25.0293	6.1	260	9.78597	289.89	484.048	-30.89	18.9888	-4.35
879	Cabeza de Hierro Mayor	Jurinea humilis	18.2622	6.18	240	12.8924	260.678	484.489	-29.23	24.4862	-4.61
8710	Cabeza de Hierro Mayor	Jurinea humilis	22.8028	2.93	284	8.13859	345.402	474.577	-29.31	26.0323	-3.87
881	Cabeza de Hierro Mayor	Silene ciliata	19.1055	15.01	347	14.0038	210.248	445.292	-28.46	16.592	-1.51
882	Cabeza de Hierro Mayor	Silene ciliata	14.0913	13.35	318	15.6353	217.384	441.859	-26.8	22.4561	0.86
883	Cabeza de Hierro Mayor	Silene ciliata	25.3878	20.26	408	13.9729	201.115	448.624	-26.65	19.5362	-0.97
884	Cabeza de Hierro Mayor	Silene ciliata	19.315	10.81	362	15.4696	194.914	446.452	-27.13	20.6669	-0.05
885	Cabeza de Hierro Mayor	Silene ciliata	26.684	13.5	414	11.8354	223.864	451.311	-27.62	21.2799	-0.09
886	Cabeza de Hierro Mayor	Silene ciliata	44.5326	29.98	356	12.4026	225.661	445.52	-26.81	22.7598	-0.61
887	Cabeza de Hierro Mayor	Silene ciliata	22.9532	17.99	350	11.6177	217.435	442.023	-27.45	21.4785	1.9
888	Cabeza de Hierro Mayor	Silene ciliata	20.267	21.81	399	10.1447	233.482	448.659	-26.2	18.0071	0.38
889	Cabeza de Hierro Mayor	Silene ciliata	45.2207	19.36	268	12.7567	231.433	449.635	-28.03	23.6899	-0.72
8810	Cabeza de Hierro Mayor	Silene ciliata	20.841	21.33	430	11.1313	206.722	449.759	-27.12	22.5325	-0.42
891	Cabeza de Hierro Mayor	Agrostis delicatula	21.013	26.14	238	11.4036	405.267	445.493	-27.66	11.339	-2.6
892	Cabeza de Hierro Mayor	Agrostis delicatula	22.2492	25.02	228	10.7065	438.706	456.347	-28.32	12.5755	-0.01
893	Cabeza de Hierro Mayor	Agrostis delicatula	15.6972	14.65	231	10.0314	421.441	446.765	-28.06	13.1826	-0.85
894	Cabeza de Hierro Mayor	Agrostis delicatula	10.5228	15.88	247	12.4891	403.214	449.725	-27.83	15.4037	-2.14
895	Cabeza de Hierro Mayor	Agrostis delicatula	11.4878	17.36	287	9.42484	442.626	459.15	-27.38	16.5594	-1.94
896	Cabeza de Hierro Mayor	Agrostis delicatula	6.771	14.96	157	11.7193	409.456	446.143	-26.9	12.0088	-0.42
897	Cabeza de Hierro Mayor	Agrostis delicatula	18.891	19.75	163	10.8272	447.262	445.593	-25.84	15.4696	-1.26
898	Cabeza de Hierro Mayor	Agrostis delicatula	6.94049	11.67	187	11.8466	376.857	338.574	-27.95	10.9395	-2.08
899	Cabeza de Hierro Mayor	Agrostis delicatula	14.4148	18.1	202	12.593	386.068	452.963	-28.24	19.1166	-1.61
8910	Cabeza de Hierro Mayor	Agrostis delicatula	17.4467	21.21	239	9.84066	430.378	455.955	-27.82	14.8064	-2.23
8101	Cabeza de Hierro Mayor	Minuartia recurva	25.0363	15.4663	75	17.3267	311.262	448.139	-29.1	20.4845	-2.81
8102	Cabeza de Hierro Mayor	Minuartia recurva	30.4421	16.6632	59	15.1148	361.493	444.564	-28.08	14.1507	-2.65
8103	Cabeza de Hierro Mayor	Minuartia recurva	26.7063	17.3744	192	11.3191	396.248	459.904	-28.54	17.4109	1.02
8104	Cabeza de Hierro Mayor	Minuartia recurva	41.0681	20.3514	137	12.781	437.24	457.709	-27.94	10.255	-0.63
8105	Cabeza de Hierro Mayor	Minuartia recurva	92.5605	32.7	132	17.9248	341.09	458.477	-28.41	16.0162	-2.5
8106	Cabeza de Hierro Mayor	Minuartia recurva	15.4345	18.0589	69	17.3534	344.012	449.816	-27.88	19.9	-3.41
8107	Cabeza de Hierro Mayor	Minuartia recurva	42.3168	20.4203	67	12.4662	172.67	458.62	-28.21	13.5866	0.07
8108	Cabeza de Hierro Mayor	Minuartia recurva	38.3798	34.1	76	12.5463	415.092	461.239	-28.78	14.223	-2.08
8109	Cabeza de Hierro Mayor	Minuartia recurva	82.0345	29.13	92	18.7675	359.466	462.7	-28.51	14.5175	-2.01
81010	Cabeza de Hierro Mayor	Minuartia recurva	107.072	29.18	107	19.4721	319.041	453.885	-27.78	14.3207	-2.34
911	Asomate-Hoyos	Armeria caespitosa	11.3289	16.64	243	12.9101	371.36	514.042	-30.16	17.6452	-0.58
912	Asomate-Hoyos	Armeria caespitosa	6.55773	11.62	248	19.574	310.807	515.455	-30.17	13.0661	-1.63
913	Asomate-Hoyos	Armeria caespitosa	5.31202	15.14	307	11.7397	349.664	514.886	-29.23	14.0756	-0.14
914	Asomate-Hoyos	Armeria caespitosa	9.23477	14.14	279	12.6003	365.61	511.958	-26.62	15.8181	0.37
915	Asomate-Hoyos	Armeria caespitosa	13.2379	14.57	211	12.6199	398.035	513.706	-28.95	20.4296	-1.07
916	Asomate-Hoyos	Armeria caespitosa	22.5395	21.98	229	16.4776	339.507	523.894	-29.47	19.0591	-0.7
917	Asomate-Hoyos	Armeria caespitosa	6.5735	13.9	178	19.0477	403.622	507.961	-30.3	18.524	-1.61
918	Asomate-Hoyos	Armeria caespitosa	8.98224	12.25	312	14.5539	360.787	516.705	-28.22	15.2446	0.14
919	Asomate-Hoyos	Armeria caespitosa	11.2551	13.68	200	16.7694	419.933	518.529	-29.15	20.1211	-0.61
9110	Asomate-Hoyos	Armeria caespitosa	8.20093	17.73	355	11.9796	340.741	524.89	-30.42	16.8264	0.25
921	Asomate-Hoyos	Juniperus communis subsp. alpina	43317.9	303	437	7.10618	389.356	488.736	-25.17	12.1564	-1.9
922	Asomate-Hoyos	Juniperus communis subsp. alpina	62132.1	300	482	6.54815	447.601	488.539	-23.61	17.2326	-1.21
923	Asomate-Hoyos	Juniperus communis subsp. alpina	75531.7	280	453	6.89368	408.666	485.59	-26.47	10.7776	-2.9
924	Asomate-Hoyos	Juniperus communis subsp. alpina	28302.6	113	406	7.28375	397.18	493.84	-23.96	15.602	-1
925	Asomate-Hoyos	Juniperus communis subsp. alpina	55438.9	336	483	6.6877	420.112	490.601	-24.47	16.9436	-0.85
926	Asomate-Hoyos	Juniperus communis subsp. alpina	25162.6	273	450	6.93102	398.535	496.6	-25	17.2651	-0.92
927	Asomate-Hoyos	Juniperus communis subsp. alpina	29511.3	160	508	6.53619	390.846	497.022	-24.77	14.1948	-2.46
928	Asomate-Hoyos	Juniperus communis subsp. alpina	89445.9	200	352	7.74651	444.487	496.2	-26.24	13.5055	-1.76
929	Asomate-Hoyos	Juniperus communis subsp. alpina	51162.4	166	463	6.73249	416.617	497.78	-26.27	13.5785	-1.95
9210	Asomate-Hoyos	Juniperus communis subsp. alpina	129528	285	400	7.53284	416.105	490.623	-24.28	16.7229	-1.08
931	Asomate-Hoyos	Festuca curvifolia	149.324	22.41	651	2.98126	530.127	479.475	-26.46	12.3629	-1.78
932	Asomate-Hoyos	Festuca curvifolia	58.0901	29.02	486	4.03744	514.267	481.077	-27.1	10.3998	-1.16
933	Asomate-Hoyos	Festuca curvifolia	47.3025	34.02	558	3.47075	545.063	493.172	-26.69	14.2665	1.28
934	Asomate-Hoyos	Festuca curvifolia	328.218	33.6	496	4.12404	513.38	491.275	-26.06	12.6544	-0.62
935	Asomate-Hoyos	Festuca curvifolia	95.1751	37.74	681	3.06684	527.991	488.791	-25.59	12.7818	-2.17
936	Asomate-Hoyos	Festuca curvifolia	16.4379	18.52	537	3.81747	476.207	493.773	-26.41	17.2965	-1.66
937	Asomate-Hoyos	Festuca curvifolia	115.118	34.07	562	3.7806	435.866	493.526	-26.66	14.8438	-2.22
938	Asomate-Hoyos	Festuca curvifolia	67.533	31.05	620	3.35889	517.433	484.77	-25.92	13.9197	-0.95
939	Asomate-Hoyos	Festuca curvifolia	109.837	38.02	508	3.97086	514.188	476.997	-25.77	13.325	-1.37
9310	Asomate-Hoyos	Festuca curvifolia	89.927	34.29	576	3.21933	530.994	482.305	-25.72	12.7658	-1.76
941	Asomate-Hoyos	Deschampsia flexuosa	113.412	26.66	328	7.12728	387.44	461.874	-29.13	14.1512	-0.68
942	Asomate-Hoyos	Deschampsia flexuosa	134.752	26.95	323	7.34724	392.953	462.746	-27.35	12.9449	-2.21
943	Asomate-Hoyos	Deschampsia flexuosa	227.196	31.54	364	6.25161	423.375	466.812	-27.93	14.4386	-2.17
944	Asomate-Hoyos	Deschampsia flexuosa	87.6216	22.71	315	7.28063	420.361	462.239	-27.73	8.99505	-2.57
945	Asomate-Hoyos	Deschampsia flexuosa	33.0577	21.07	285	8.00396	422.029	456.655	-28.54	9.64352	-3.17
946	Asomate-Hoyos	Deschampsia flexuosa	138.576	22.99	246	10.6908	366.696	463.844	-29.06	14.8457	-1.37
947	Asomate-Hoyos	Deschampsia flexuosa	77.1471	23.67	286	6.60642	453.665	458.419	-27.47	11.671	-1.74
948	Asomate-Hoyos	Deschampsia flexuosa	76.4321	29.31	284	8.14581	424.18	472.185	-28.15	15.3759	1.73
949	Asomate-Hoyos	Deschampsia flexuosa	94.4626	20.52	288	8.48923	389.457	464.649	-26.96	10.5123	-0.88
9410	Asomate-Hoyos	Deschampsia flexuosa	117.015	28.47	286	6.00531	454.962	461.767	-27.11	11.6918	-1.84
951	Asomate-Hoyos	Jasione crispa	35.7059	15.01	180	20.3213	227.402	456.031	-28.8674	19.8061	-1.18551
952	Asomate-Hoyos	Jasione crispa	13.2596	12.87	201	16.9458	242.894	461.031	-28.9674	21.6061	-1.95507
953	Asomate-Hoyos	Jasione crispa	16.548	11.57	239	16.0001	245.455	447.531	-28.7674	18.0061	-0.185507
954	Asomate-Hoyos	Jasione crispa	20.017	13.45	186	19.9379	234.62	460.031	-29.1674	20.8061	-1.88551
955	Asomate-Hoyos	Jasione crispa	68.9247	20.83	171	24.2079	196.442	448.146	-28.5674	18.8061	-1.08551
956	Asomate-Hoyos	Jasione crispa	12.5056	10.64	190	16.672	273.517	456.031	-29.3674	20.8061	-0.585507
957	Asomate-Hoyos	Jasione crispa	20.5908	17.66	189	14.5735	279.494	459.931	-28.3674	17.7061	-1.48551
958	Asomate-Hoyos	Jasione crispa	24.6299	15.68	243	15.1506	254.918	463.031	-29.5674	22.9061	-1.82551
959	Asomate-Hoyos	Jasione crispa	21.175	13.33	196	17.2251	266.967	462.031	-28.1674	18.8061	-1.12551
9510	Asomate-Hoyos	Jasione crispa	17.3689	12.56	204	18.9946	241.045	446.031	-29.7674	19.0555	-0.508551
961	Asomate-Hoyos	Jurinea humilis	17.1171	4.64	271	13.5866	219.213	480.493	-29.33	16.9052	-1.51
962	Asomate-Hoyos	Jurinea humilis	13.5515	3.65	329	8.91186	329.809	482.642	-29.7	16.7859	-1.99
963	Asomate-Hoyos	Jurinea humilis	12.2525	3.93	273	8.32865	303.598	498.419	-28.52	20.7252	-2.8
964	Asomate-Hoyos	Jurinea humilis	24.4216	5.4	294	8.2296	289.105	488.758	-29.2	14.0264	-3.02
965	Asomate-Hoyos	Jurinea humilis	18.8023	7.99	348	10.6468	241.464	469.55	-29.48	15.7239	-1.84
966	Asomate-Hoyos	Jurinea humilis	14.7135	10.12	297	9.16689	263.412	466.53	-29.1	18.6107	-2.68
967	Asomate-Hoyos	Jurinea humilis	10.3123	7.93	255	8.53993	277.575	488.509	-29.26	19.5216	-2.14
968	Asomate-Hoyos	Jurinea humilis	8.01907	7.76	346	9.10196	294.247	481.938	-29.42	14.494	-2.4
969	Asomate-Hoyos	Jurinea humilis	8.51191	8.79	220	8.75804	357.819	485.126	-28.81	17.1475	-1.03
9610	Asomate-Hoyos	Jurinea humilis	21.7647	8.16	255	9.63584	253.22	487.159	-29.61	15.8763	-2.6
971	Asomate-Hoyos	Pilosella vahlii	12.1254	20.47	262	17.1356	232.966	471.891	-28.29	16.7357	-2.42
972	Asomate-Hoyos	Pilosella vahlii	10.6741	31.61	311	14.9626	230.375	462.953	-27.75	14.3799	-2.61
973	Asomate-Hoyos	Pilosella vahlii	7.29645	12.54	265	14.9137	235.419	470.416	-27.62	15.5924	-4.13
974	Asomate-Hoyos	Pilosella vahlii	8.39969	20.19	297	16.061	197.886	460.773	-27.94	18.8562	-2.8
975	Asomate-Hoyos	Pilosella vahlii	4.25812	12.86	310	15.0725	206.769	479.134	-27.45	24.6268	-1.84
976	Asomate-Hoyos	Pilosella vahlii	12.7761	25.28	338	16.4	221.187	472.118	-26.93	18.5517	-3.04
977	Asomate-Hoyos	Pilosella vahlii	6.87779	23.6	304	17.688	203.197	461.8	-27.3	16.7505	-2.85
978	Asomate-Hoyos	Pilosella vahlii	7.19255	21.6	287	13.2429	232.234	458.441	-26.85	16.9461	-3.25
979	Asomate-Hoyos	Pilosella vahlii	10.6295	21.84	255	16.4101	242.578	469.912	-27.61	20.7763	-2.83
9710	Asomate-Hoyos	Pilosella vahlii	7.20074	22.44	266	17.351	219.526	494.965	-28.68	22.8125	1.96
991	Asomate-Hoyos	Silene ciliata	30.2638	24.66	314	11.9615	216.075	438.962	-27.92	17.2413	0.55
992	Asomate-Hoyos	Silene ciliata	28.7368	16.76	440	10.5297	226.125	443.234	-27.6	22.2197	0.47
993	Asomate-Hoyos	Silene ciliata	31.1456	23.86	426	11.2698	232.717	448.996	-27.06	22.0721	0.92
994	Asomate-Hoyos	Silene ciliata	12.5054	20.29	344	12.708	226.227	451.432	-27.56	16.6894	1.45
995	Asomate-Hoyos	Silene ciliata	108.286	29.74	400	11.2582	242.166	449.917	-27.76	15.6914	0.02
996	Asomate-Hoyos	Silene ciliata	34.4598	23.59	352	14.1563	203.2	438.485	-28	15.8124	1.3
997	Asomate-Hoyos	Silene ciliata	16.9606	17.59	460	11.4003	208.086	440.267	-27.81	21.0434	0.64
998	Asomate-Hoyos	Silene ciliata	51.9858	20.38	320	14.5582	225.532	444.331	-26.86	19.5484	1.24
999	Asomate-Hoyos	Silene ciliata	33.1604	27.5	367	10.3253	259.962	456.995	-25.86	20.5391	2.21
9910	Asomate-Hoyos	Silene ciliata	73.3727	27.84	411	13.3519	222.713	438.658	-26.82	21.0479	1.39
9101	Asomate-Hoyos	Minuartia recurva	72.1634	18.54	103	20.3591	331.34	463.609	-28.36	16.4074	-2.1
9102	Asomate-Hoyos	Minuartia recurva	69.212	21.9	136	13.2655	344.092	455.994	-29.08	14.1694	-1.18
9103	Asomate-Hoyos	Minuartia recurva	11.2079	11.04	97	13.6479	386.169	462.158	-27.46	12.5671	-0.4
9104	Asomate-Hoyos	Minuartia recurva	25.6868	14.27	389	19.496	321.709	454.386	-28.17	14.0378	-1.76
9105	Asomate-Hoyos	Minuartia recurva	93.3655	30.71	133	17.5128	316.818	457.19	-29.09	17.3082	-2.17
9106	Asomate-Hoyos	Minuartia recurva	9.27514	6.74	56	23.7222	301.667	464.632	-28.33	17.6303	-0.31
9107	Asomate-Hoyos	Minuartia recurva	41.1583	13.38	145	14.6514	296.266	450.686	-28.88	17.959	-0.9
9108	Asomate-Hoyos	Minuartia recurva	41.852	19.3	104	16.1183	332.942	461.389	-27.59	16.9919	-1.56
9109	Asomate-Hoyos	Minuartia recurva	11.31	6.94	75	18.4198	343.017	454.945	-27.71	15.6583	-0.43
91010	Asomate-Hoyos	Minuartia recurva	7.67233	7	106	15.2933	363.384	461.302	-29.15	13.472	-0.89
